# Supplementary material for: High Constitutive Cytokine Release by Primary Human Acute Myeloid Leukemia Cells Is Associated with a Specific Intercellular Communication Phenotype
Source: PubMed Central journal article supplement (PMC6678419; doi:10.3390/jcm8070970), 2019-07-04
Supplement: jcm-08-00970-s001.pdf [file jcm-08-00970-s001.pdf]

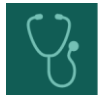

*Supplementary Information*

# High Constitutive Cytokine Release by Primary Human Acute Myeloid Leukemia Cells Is Associated with a Specific Intercellular Communication Phenotype

Håkon Reikvam <sup>1,2,\*</sup>, Elise Aasebø <sup>1</sup>, Annette K. Brenner <sup>2</sup>, Sushma Bartaula-Brevik <sup>1</sup>,  
Ida Sofie Grønningsæter <sup>2</sup>, Rakel Brendsdal Forthun <sup>2</sup>, Randi Hovland <sup>3,4</sup> and Øystein Bruserud <sup>1,2</sup>

<sup>1</sup> Department of Clinical Science, University of Bergen, 5020, Bergen, Norway

<sup>2</sup> Department of Medicine, Haukeland University Hospital, 5021, Bergen, Norway

<sup>3</sup> Department of Medical Genetics, Haukeland University Hospital, 5021, Bergen, Norway

<sup>4</sup> Institute of Biomedicine, University of Bergen, 5020, Bergen, Norway

\* Correspondence: Hakon.Reikvam@med.uib.no; Tel.: +55-97-50-00

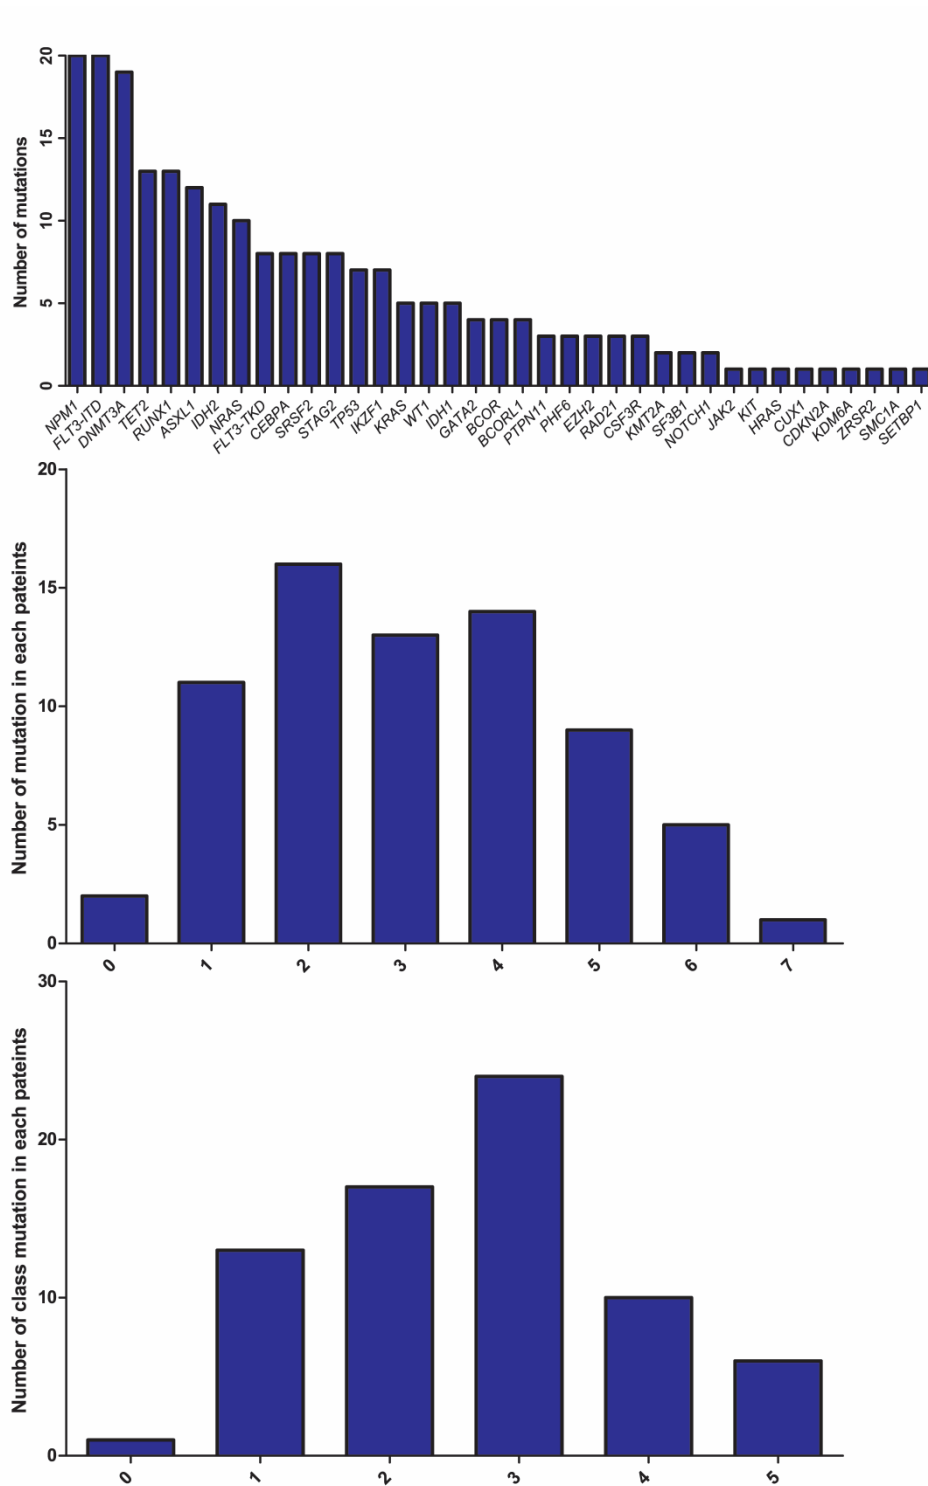

**Figure S1.** Mutational studies in a cohort of 71 AML patients. The figure shows the number of patients with the various mutations (upper), the number of mutations in for each patient (middle) and the number of main classes with mutation(s) in each patient (lower).

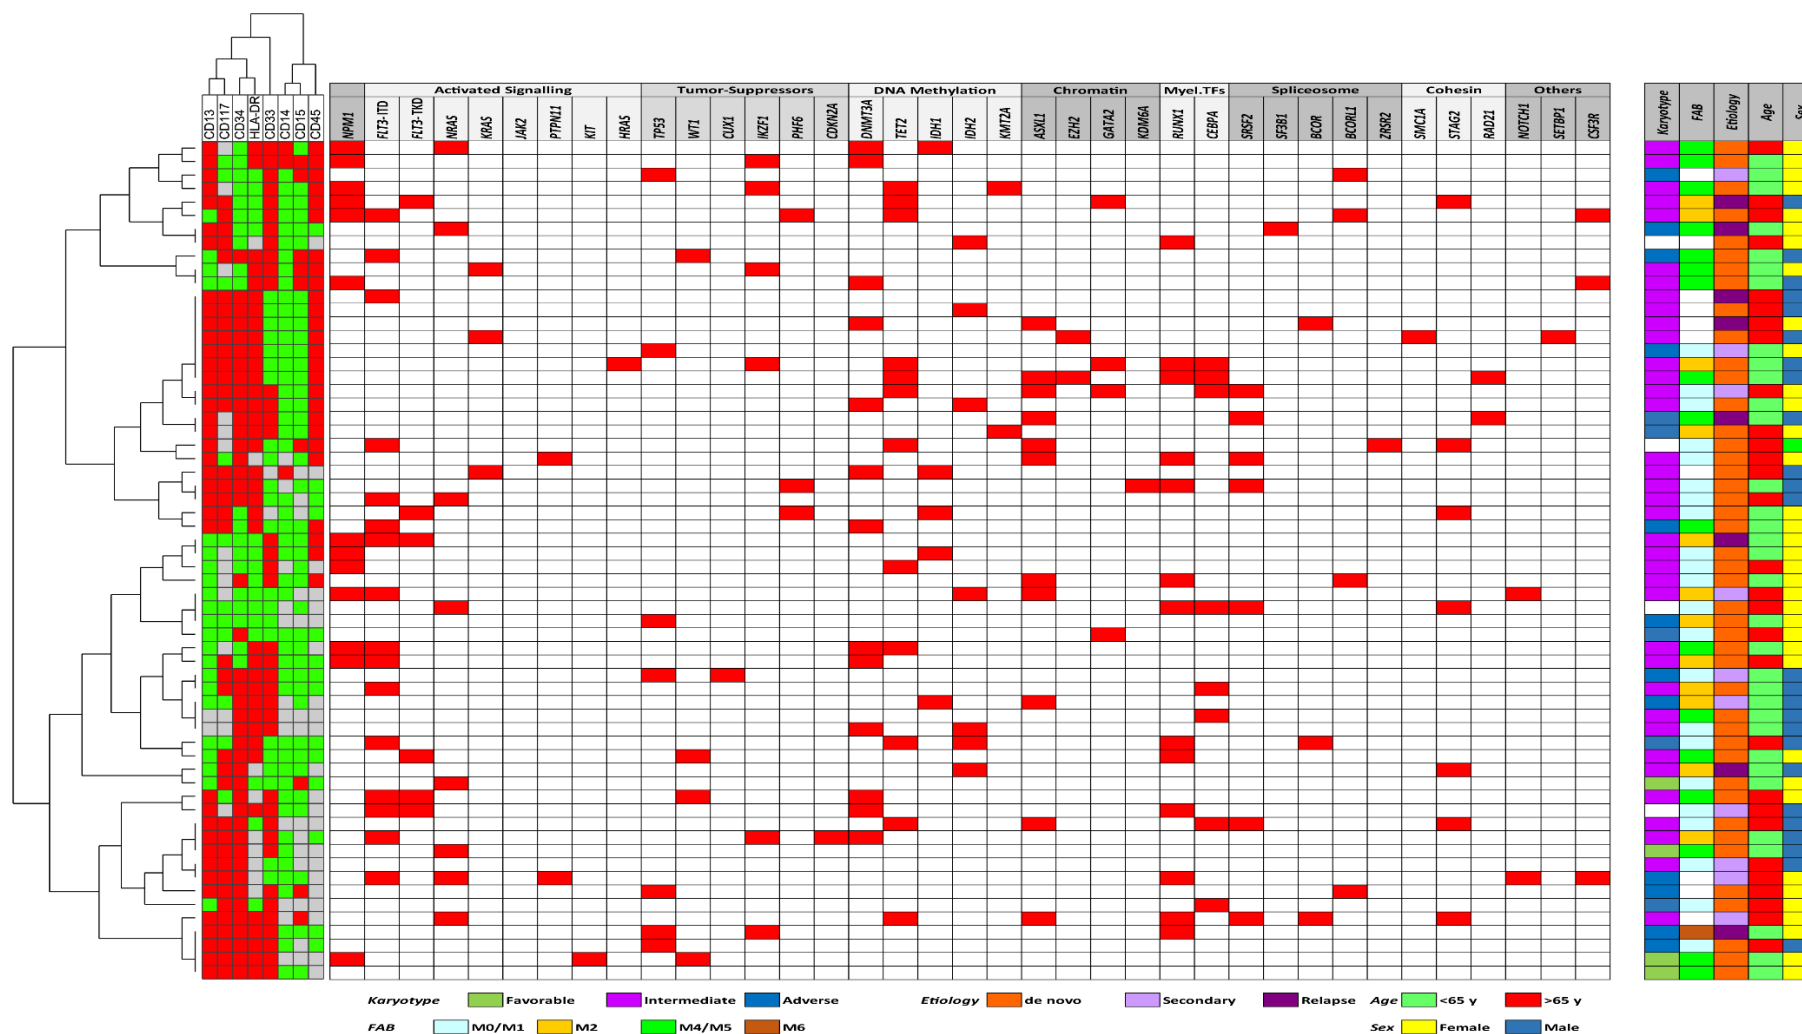

**Figure S2.** The immunophenotype of primary human AML cells derived from 62 unselected patients. The expression of the eight differentiation markers CD13, CD14, CD15, CD33, CD34, CD45, CD117 and HLA-DR was investigated for 62 of the 71 patients included in our present study. We performed an unsupervised hierarchical cluster analysis and identified four patient main clusters/patient subsets. The mutational profile for each of the 62 patients is also given (middle), no individual mutation of main class of mutations showed any significant association with any of the for differentiation marker clusters (middle). Finally, the four main patient clusters did not differ with regard to karyotype, FAB classification, etiology, age and gender either (right). Grey cells indicate missing data.

We performed a significant analysis of the global gene expression profiles using microarray analysis. We selected discriminative genes by identifying a d-score >3.5 in significance analysis of microarray (SAM), and we could then identify 149 genes being differently expressed between the two groups. We performed an unsupervised hierarchical cluster analysis (Euclidean measure, and complete distance) based on these genes and were able to identify two patient clusters/subsets corresponding to patients with high (red color in the left column) and low constitutive release (blue color); the only outlier was a high-release patient. The two patient subsets did not differ with regard to their mutational profile or their biological or clinical characteristics (karyotype, FAB classification, etiology, age and gender; right part).

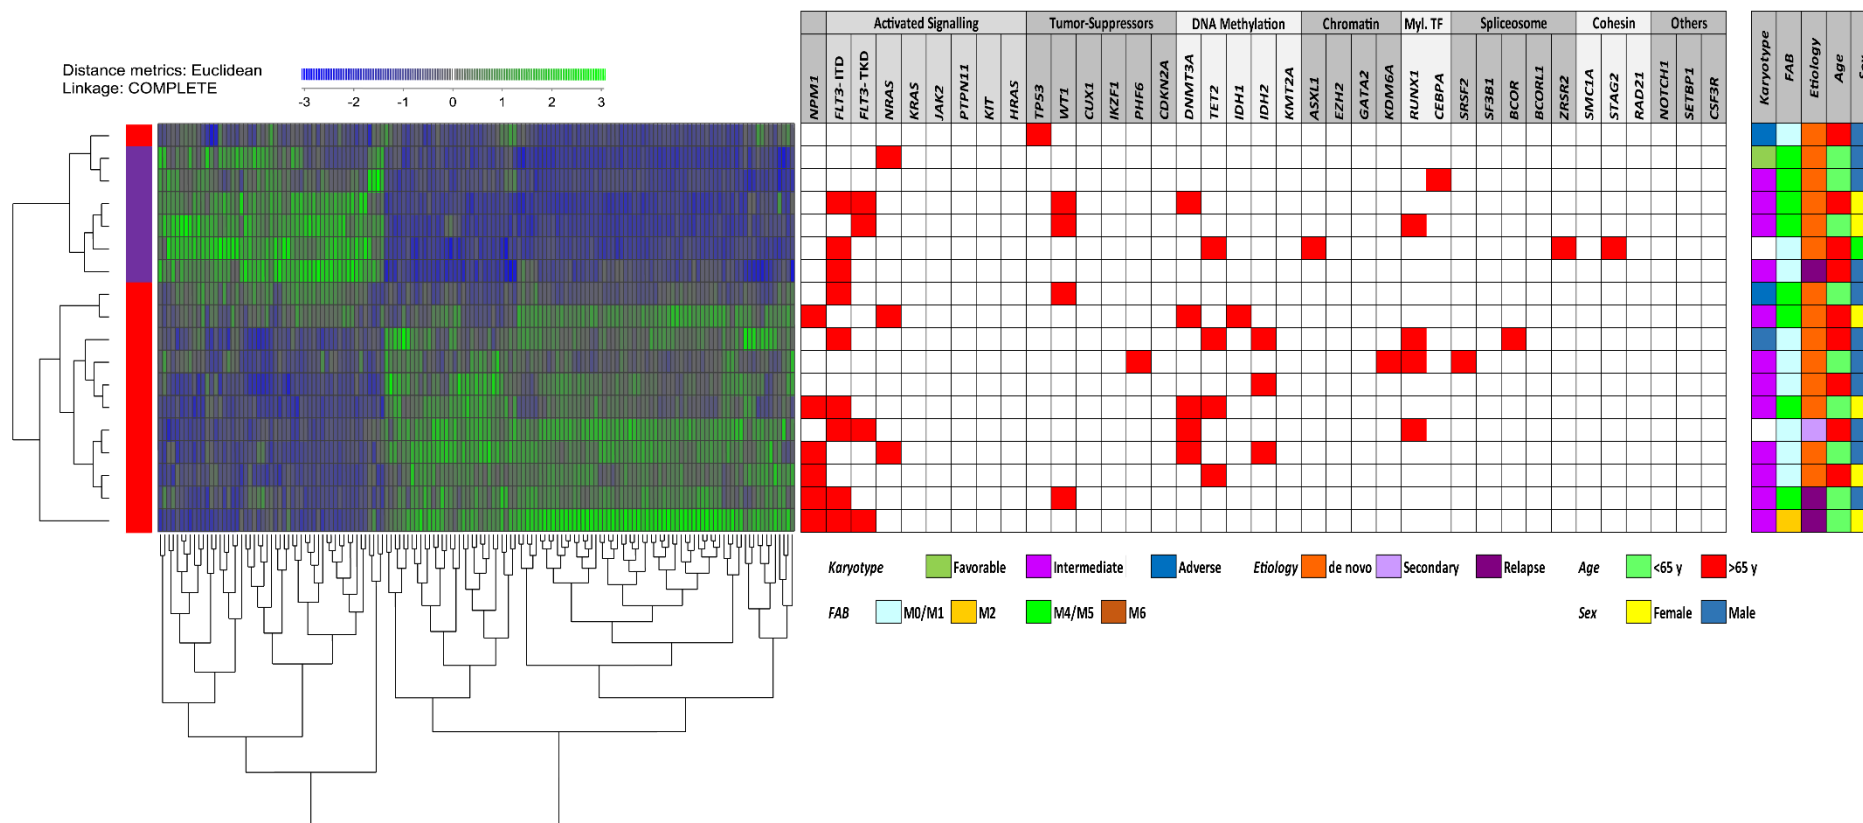

**Figure S3.** A comparison of global gene expression profiles for unselected patients with high ( $n = 12$  patients) and low ( $n = 6$ ) constitutive release of extracellular mediators.

**Table S1.** The biological and clinical characteristics of the 16 patients included in the proteomic studies.

| Patients                         | Sex | Age | Previous     | FAB | Hb    | TPK  | Cell surface markers |      |      |      |      |       | Genetic abnormalities |           |             |             |
|----------------------------------|-----|-----|--------------|-----|-------|------|----------------------|------|------|------|------|-------|-----------------------|-----------|-------------|-------------|
|                                  |     |     |              |     |       |      | CD13                 | CD14 | CD15 | CD33 | CD34 | CD117 | HLA-DR                | Cytogen   | <i>FLT3</i> | <i>NPM1</i> |
| <b>High constitutive release</b> |     |     |              |     |       |      |                      |      |      |      |      |       |                       |           |             |             |
| 1                                | M   | 42  |              | M2  | 10    | 63   | (+)                  | -    | -    | +    | +    | +     | +                     | Normal    | ITD         | wt          |
| 2                                | F   | 66  |              | M1  | 7.10  | 80   | -                    | nt   | -    | +    | -    | nt    | -                     | Normal    | wt          | ins         |
| 3                                | M   | 46  |              | M1  | 15.40 | 113  | +                    | nt   | +    | nt   | nt   | nt    | nt                    | Normal    | wt          | ins         |
| 4                                | K   | 67  |              | M0  | 8.6   | 216  | (+)                  | -    | nt   | +    | +    | (+)   | -                     | +21       | wt          | wt          |
| 5                                | M   | 60  |              | M4  | 6.1   | 632  | +                    | -    | nt   | +    | +    | +     | +                     | del9      | ITD         | wt          |
| 6                                | M   | 53  |              | M0  | 9.40  | 84   | +                    | nt   | +    | +    | +    | +     | +                     | pluss 13  | wt          | wt          |
| 7                                | M   | 67  |              | M0  | 13.20 | 180  | -                    | -    | -    | -    | +    | -     | +                     | del5      | ITD         | wt          |
| 8                                | M   | 62  |              | M4  | 11.30 | 8    | +                    | -    | -    | +    | +    | +     | +                     | Trisomy 8 | wt          | wt          |
| <b>Low constitutive release</b>  |     |     |              |     |       |      |                      |      |      |      |      |       |                       |           |             |             |
| 9                                | F   | 18  |              | M4  | 9.90  | 46   | +                    | nt   | nt   | +    | +    | +     | +                     | Inv16     | wt          | wt          |
| 10                               | F   | 46  |              | M1  | 10.80 | 1182 | +                    | -    | +    | +    | +    | +     | +                     | Inv16     | wt          | wt          |
| 11                               | F   | 42  |              | M5  | 9.20  | 142  | +                    | +    | +    | +    | -    | -     | +                     | Normal    | wt          | ins         |
| 12                               | M   | 58  |              | M5  | 9.60  | 20   | nt                   | nt   | nt   | +    | +    | nt    | +                     | Normal    | wt          | wt          |
| 13                               | M   | 48  |              | M5  | 9.50  | 17   | +                    | +    | -    | +    | -    | +     | +                     | Normal    | ITD         | ins         |
| 14                               | M   | 36  |              | M4  | 9.6   | 41   | nt                   | (+)  | nt   | nt   | +    | +     | +                     | Inv16     | wt          | wt          |
| 15                               | F   | 55  |              | M4  | 11.2  | 20   | +                    | -    | +    | +    | +    | +     | +                     | Inv16     | wt          | wt          |
| 16                               | F   | 29  | Chemotherapy | M5  | 8.60  | 18   | +                    | +    | -    | +    | +    | +     | +                     | Normal    | ITD+TKD     | wt          |

**Table S2.** The mutational profile of patients with high or low constitutive mediator release and included in the proteomic studies.

| Classification           | Mutation           | High release group | Low release group  | Classification                              | Mutation           | High release group | Low release group |
|--------------------------|--------------------|--------------------|--------------------|---------------------------------------------|--------------------|--------------------|-------------------|
| <b>NPM1</b>              | <i>NPM1</i>        | 2                  | 3                  | <b>Chromatin modification</b>               | <i>ASXL1</i>       | 2                  | 0                 |
|                          | <b>Total group</b> | 2                  | 3                  |                                             | <i>EZH2</i>        | 1                  | 0                 |
|                          | <i>FLT3-ITD</i>    | 3                  | 1                  |                                             | <i>GATA2</i>       | 0                  | 0                 |
| <i>FLT3-TKD</i>          | 0                  | 2                  | <i>KDM6A</i>       |                                             | 1                  | 0                  |                   |
|                          |                    |                    |                    |                                             | <b>Total group</b> | 4                  | 0                 |
| <b>Signaling</b>         | <i>HRAS</i>        | 0                  | 0                  | <b>Myeloid transcription factors</b>        | <i>CEBPA</i>       | 3                  | 1                 |
|                          | <i>JAK2</i>        | 0                  | 0                  |                                             | <i>RUNX1</i>       | 3                  | 1                 |
|                          | <i>KIT</i>         | 0                  | 1                  |                                             | <b>Total group</b> | 6                  | 2                 |
|                          | <i>KRAS</i>        | 0                  | 0                  |                                             | <i>BCOR</i>        | 1                  | 0                 |
|                          | <i>NRAS</i>        | 1                  | 2                  | <i>BCORL1</i>                               | 0                  | 0                  |                   |
|                          | <i>PTPN11</i>      | 0                  | 0                  | <b>Spliceosome/transcription repressors</b> | <i>SF3B1</i>       | 0                  | 0                 |
| <b>Total group</b>       | 4                  | 6                  | <i>SRSF2</i>       |                                             | 1                  | 0                  |                   |
| <i>CDKN2A</i>            | 1                  | 0                  | <i>ZRSB2</i>       |                                             | 1                  | 0                  |                   |
| <i>CUX1</i>              | 0                  | 0                  | <b>Total group</b> |                                             | 3                  | 0                  |                   |
| <i>IKZF1</i>             | 1                  | 1                  | <i>RAD21</i>       |                                             | 1                  | 0                  |                   |
| <b>Tumor suppressors</b> | <i>PHF6</i>        | 1                  | 0                  | <b>Cohesin</b>                              | <i>SMC1A</i>       | 0                  | 0                 |
|                          | <i>TP53</i>        | 0                  | 0                  |                                             | <i>STAG2</i>       | 1                  | 0                 |
|                          | <i>WT1</i>         | 0                  | 2                  |                                             | <b>Total group</b> | 2                  | 0                 |
|                          | <b>Total group</b> | 3                  | 3                  |                                             | <i>CSF3R</i>       | 0                  | 0                 |
| <b>DNA methylation</b>   | <i>DNMT3A</i>      | 2                  | 2                  | <b>Others</b>                               | <i>NOTCH1</i>      | 0                  | 0                 |
|                          | <i>IDH1</i>        | 0                  | 0                  |                                             | <i>SETBP1</i>      | 0                  | 0                 |
|                          | <i>IDH2</i>        | 2                  | 1                  |                                             | <b>Total group</b> | 0                  | 0                 |
|                          | <i>KMT2A/MLL</i>   | 0                  | 0                  |                                             |                    |                    |                   |
|                          | <i>TET2</i>        | 3                  | 0                  |                                             |                    |                    |                   |
| <b>Total group</b>       | 7                  | 3                  |                    |                                             |                    |                    |                   |

**Table S3.** Statistical comparisons of associations between various mutations and between mutations and signs of AML cell differentiation (morphology, CD34 expression). The analyses are based on Fisher’s exact test, two-tailed p-values are given. The table presents the comparison, the corresponding 2x2 tables and the uncorrected p-values. The intention with these analyses was to verify that our present patient population is representative by confirming that we can detect the same significant associations as described in previous larger studies. We then did 11 comparisons and significant p-values are marked in bold; those comparisons that remain significant also when doing a Bonfessoni correction are marked with \*.

| Comparison                                                                   | Basis for the statistical analyses |                   | p-value          |          |
|------------------------------------------------------------------------------|------------------------------------|-------------------|------------------|----------|
|                                                                              |                                    |                   |                  |          |
| NPM1 mutations versus FLT3-ITD                                               | NPM1-mutated                       | FLT3-ITD<br>9     | FLT3 wt<br>11    | 0.4233   |
|                                                                              | NPM1 wt                            | 11                | 40               |          |
| NPM1 mutations versus DNA methylating gene mutations (DNAmgm)                | NPM1-mutated                       | DNAmgm+<br>17     | DNAmgm wt<br>3   | 0.0015*  |
|                                                                              | NPM wt                             | 22                | 29               |          |
| NPM1 mutations versus Myeloid Transcription Factor mutations (MTFm)          | NPM1-mutated                       | MTFm+<br>20       | MTF wt<br>0      | <0.0001* |
|                                                                              | NPM1 wt                            | 18                | 33               |          |
| TP53 mutations versus complex karyotype                                      | TP53 mutated                       | Complex<br>7      | Not complex<br>0 | 0.049    |
|                                                                              | TP53 wt                            | 10                | 54               |          |
| NPM1 mutation versus morphological differentiation (i.e. FAB classification) | NPM1-mutated                       | M2/M4/M5/M6<br>16 | M0/M1<br>3       | 0.0233   |
|                                                                              | NPM 1 wt                           | 23                | 21               |          |
| NPM1 mutation versus CD33 expression                                         | NPM1-mutated                       | CD33+<br>12       | CD33-<br>1       | 0.0208   |
|                                                                              | NPM1wt                             | 26                | 21               |          |
| NPM1 mutations versus CD34 expression                                        | NPM1-mutated                       | CD34+<br>1        | CD34-<br>12      | <0.0001* |
|                                                                              | NPM1 wt                            | 41                | 8                |          |
| FLT3-ITD versus CD34 expression                                              | FLT3-ITD                           | CD34+<br>10       | CD34-<br>6       | 0.7522   |
|                                                                              | FLT3 wt                            | 32                | 14               |          |
| DNMT3A mutations versus CD34 expression                                      | DNMT3A-mutated                     | CD34+<br>7        | CD34-<br>6       | 0.3178   |
|                                                                              | DNMT3A wt                          | 35                | 14               |          |
| Chromatin Modifier (CM) mutations versus CD34 expression                     | CM-mutated                         | CD34+<br>28       | CD34-<br>19      | 0.0159   |
|                                                                              | CM wt                              | 3                 | 12               |          |

**Table 4.** Proteomic profiling based on AML secretome. The proteomic comparison of enriched primary human AML cells showing high and low constitutive release of extracellular mediators. The results are presented as the protein identity (presented by gene name) together with the z-statistics p-value (z-score) and the Welch’s t-test p-value, the median protein levels (of log<sub>2</sub> transformed protein intensities) for AML cells with generally low and high constitutive release of extracellular mediators, and the fold change (in log<sub>2</sub> scale) for each mediator when comparing the level of high constitutive AML cell release cells versus low release cells. A summary of the protein function together with key words is also presented; this information is based on the Gene database and selected references identified in the PubMed database. The selection is based on the GO terms Cell compartment listed in Table 3 in the article (detailed explanation given in the Table, see below).

| Protein, Z-score, p-value                                                                                            | Level, Low release | Level, High release | Fold change (log <sub>2</sub> ) High vs. low | Summary                                                                                                                                                                                                                                                                                                                                                                                                                                                                                                                                                                                                   | Keywords                               |
|----------------------------------------------------------------------------------------------------------------------|--------------------|---------------------|----------------------------------------------|-----------------------------------------------------------------------------------------------------------------------------------------------------------------------------------------------------------------------------------------------------------------------------------------------------------------------------------------------------------------------------------------------------------------------------------------------------------------------------------------------------------------------------------------------------------------------------------------------------------|----------------------------------------|
| <b>Proteins Showing High Abundance for Cells with Low Constitutive Release (n = 12)</b>                              |                    |                     |                                              |                                                                                                                                                                                                                                                                                                                                                                                                                                                                                                                                                                                                           |                                        |
| Belonging to the terms GO:0000790-nuclear chromatin and GO:0005736-DNA-directed RNA polymerase complex (see Table 3) |                    |                     |                                              |                                                                                                                                                                                                                                                                                                                                                                                                                                                                                                                                                                                                           |                                        |
| H1F0<br>3,46 × 10 <sup>-10</sup><br>0.018516                                                                         | 27.70              | 25.30               | -2.41                                        | <i>H1 histone family member 0.</i> Histones are basic nuclear proteins that are responsible for the nucleosome structure of the chromosomal fiber in eukaryotes. Nucleosomes consist of approximately 146 bp of DNA wrapped around a histone octamer composed of pairs of each of the four core histones (H2A, H2B, H3, and H4). The chromatin fiber is further compacted through the interaction of a linker histone, H1, with the DNA between the nucleosomes to form higher order chromatin structures. This gene encodes a replication-independent histone that is a member of the histone H1 family. | Histone,<br>Gene expression            |
| 2HIST1H2AJ<br>0.000188<br>0.038121                                                                                   | 22.57              | 21.20               | -1.37                                        | <i>Histone cluster 1 H2A family member j.</i> Two molecules of each of the four core histones (H2A, H2B, H3, and H4) form an octamer, around which approximately 146 bp of DNA is wrapped in repeating units, called nucleosomes. This gene encodes a replication-dependent histone that is a member of the histone H2A family. This gene is found in the small histone gene cluster on chromosome 6p22-p21.3.                                                                                                                                                                                            | Chromatin<br>Histone                   |
| MEN1<br>0.043127<br>0.039881                                                                                         | 23.45              | 22.81               | -0,64                                        | Menin 1. This protein is a tumor suppressor. It is a scaffold protein that functions in histone modification and epigenetic gene regulation.                                                                                                                                                                                                                                                                                                                                                                                                                                                              | Histone<br>modification<br>Epigenetics |
| MBD3<br>0.001206<br>0.039855                                                                                         | 24.83              | 23.67               | -1.16                                        | <i>Methyl-CpG binding domain protein 3.</i> This gene belongs to a family of nuclear proteins which are characterized by the presence of a methyl-CpG binding domain (MBD). The encoded protein is a subunit of the NuRD, a multisubunit complex containing nucleosome remodeling and histone deacetylase activities. The protein mediates the                                                                                                                                                                                                                                                            | Nucleosome<br>Histone<br>deacetylation |



|                                        |       |       |       |                                                                                                                                                                                                                                                                                                                                                                                                                                                                                                                                                                                                                                                                                                                               |                              |
|----------------------------------------|-------|-------|-------|-------------------------------------------------------------------------------------------------------------------------------------------------------------------------------------------------------------------------------------------------------------------------------------------------------------------------------------------------------------------------------------------------------------------------------------------------------------------------------------------------------------------------------------------------------------------------------------------------------------------------------------------------------------------------------------------------------------------------------|------------------------------|
|                                        |       |       |       | association of metastasis-associated protein 2 with the core histone deacetylase complex.                                                                                                                                                                                                                                                                                                                                                                                                                                                                                                                                                                                                                                     |                              |
| JUND<br>0.011365<br>0.007308           | 23.03 | 22.17 | -0.86 | <i>JunD proto-oncogene, AP-1 transcription factor subunit.</i> The protein is a member of the JUN family, and a functional component of the AP1 transcription factor complex. This protein has been proposed to protect cells from p53-dependent senescence and apoptosis.                                                                                                                                                                                                                                                                                                                                                                                                                                                    | Transcription                |
| POLR1A<br>0.002519<br>0.010079         | 25.49 | 24.42 | -1.07 | <i>RNA polymerase I subunit A.</i> The encoded protein is the largest subunit of the RNA polymerase I complex. The encoded protein represents the catalytic subunit of the complex, which transcribes DNA into ribosomal RNA precursors.                                                                                                                                                                                                                                                                                                                                                                                                                                                                                      | Transcription<br>RNA         |
| POLR1B<br>0.003823<br>0.020031         | 24.10 | 23.09 | -1.02 | <i>RNA polymerase I subunit B.</i> RNA polymerase I (pol I) is responsible for the transcription of ribosomal RNA (rRNA) genes and production of rRNA. the primary component of ribosomes. Pol I is a multisubunit enzyme. Most of the mass of the pol I complex derives from the 2 largest subunits. Rpa1 and Rpa2 in yeast. POLR1B is homologous to Rpa2                                                                                                                                                                                                                                                                                                                                                                    | Transcription<br>RNA         |
| POGZ<br>0,001956<br>0,02357            | 25.14 | 24.03 | -1.10 | <i>Pogo transposable element derived with ZNF domain.</i> The protein appears to be a zinc finger protein that interacts with the transcription factor SP1.                                                                                                                                                                                                                                                                                                                                                                                                                                                                                                                                                                   | Transcription                |
| POLR1E (PAF53)<br>0.008485<br>0.049055 | 23.29 | 22.39 | -0.91 | <i>RNA polymerase I subunit E. Expressed in the bone marrow.</i> POLR1E/PAF53 is essential for specific rDNA transcription. its levels are regulated in response to growth factors and it is important for cell proliferation (1). Furthermore, nuclear Sirtuin SIRT7 targets POLR1E that is a subunit of RNA polymerase I (Pol I). Acetylation of POLR1E at lysine 373 by CBP and deacetylation by SIRT7 modulate the association of Pol I with DNA. hypoacetylation correlating with increased rDNA occupancy of Pol I and transcription activation. Nucleolar detention requires binding of SIRT7 to nascent pre-rRNA. linking the spatial distribution of SIRT7 and deacetylation of POLR1E to ongoing transcription (2). | Transcription<br>Acetylation |
| ACTL6A<br>0.017829<br>0.023698         | 27.85 | 27.06 | -0.79 | <i>Actin like 6A.</i> This gene encodes an actin-related protein (ARPs) which share significant amino acid sequence identity to conventional actins. The ARPs are involved in vesicular transport, spindle orientation, nuclear migration and chromatin remodeling. This gene encodes a 53 kDa subunit protein of the BAF complex that is thought to facilitate transcriptional activation of specific genes by antagonizing chromatin-mediated transcriptional repression.                                                                                                                                                                                                                                                   | Chromatin<br>Transcription   |

|                                                                                                                                                                                                                                                                                                                                           |       |       |       |                                                                                                                                                                                                                                                                                                                                                                                                                                                                                                                                                                                                                                                                                                                                                                                                                                                                |                                                  |
|-------------------------------------------------------------------------------------------------------------------------------------------------------------------------------------------------------------------------------------------------------------------------------------------------------------------------------------------|-------|-------|-------|----------------------------------------------------------------------------------------------------------------------------------------------------------------------------------------------------------------------------------------------------------------------------------------------------------------------------------------------------------------------------------------------------------------------------------------------------------------------------------------------------------------------------------------------------------------------------------------------------------------------------------------------------------------------------------------------------------------------------------------------------------------------------------------------------------------------------------------------------------------|--------------------------------------------------|
| TWISTNB<br>0.023213<br>0.02204                                                                                                                                                                                                                                                                                                            | 22.41 | 21.66 | -0.75 | <i>TWIST neighbor</i> . High bone marrow expression (3).                                                                                                                                                                                                                                                                                                                                                                                                                                                                                                                                                                                                                                                                                                                                                                                                       |                                                  |
| SMARCE1<br>0.024052<br>0.032658                                                                                                                                                                                                                                                                                                           | 27.37 | 26.63 | -0.74 | <i>SWI/SNF related. matrix associated. actin dependent regulator of chromatin. subfamily e. member 1</i> . The encoded protein is part of the large ATP-dependent chromatin remodeling complex SWI/SNF. which is required for transcriptional activation of genes normally repressed by chromatin. The encoded protein. either alone or when in the SWI/SNF complex. can bind to 4-way junction DNA. which is thought to mimic the topology of DNA as it enters or exits the nucleosome.                                                                                                                                                                                                                                                                                                                                                                       | Chromatin<br>Transcription<br>Nucleosome         |
| <b>Proteins Showing High Abundance for Cells with High Constitutive Release (n = 75)</b>                                                                                                                                                                                                                                                  |       |       |       |                                                                                                                                                                                                                                                                                                                                                                                                                                                                                                                                                                                                                                                                                                                                                                                                                                                                |                                                  |
| These proteins represent the subset of proteins included in the go terms go:0070062~extracellular exosome, go:0005829~cytosol, go:0016020~membrane and go:0005737~cytoplasm (see figure 4 in the article); in addition they were included in the large interacting protein network presented in the left part of Figure 5 in the article. |       |       |       |                                                                                                                                                                                                                                                                                                                                                                                                                                                                                                                                                                                                                                                                                                                                                                                                                                                                |                                                  |
| <b>Phagocytosis-neutrophils (n = 6)</b>                                                                                                                                                                                                                                                                                                   |       |       |       |                                                                                                                                                                                                                                                                                                                                                                                                                                                                                                                                                                                                                                                                                                                                                                                                                                                                |                                                  |
| PLXNB2<br>0.032126<br>0.004193                                                                                                                                                                                                                                                                                                            | 25.00 | 25.85 | 0.84  | <i>Plexin B2</i> . Members of the B class of plexins. such as PLXNB2 are transmembrane receptors that participate cell migration in response to semphorins.                                                                                                                                                                                                                                                                                                                                                                                                                                                                                                                                                                                                                                                                                                    | Cell migration                                   |
| CYBA<br>1.61 × 10 <sup>-6</sup><br>0.00                                                                                                                                                                                                                                                                                                   | 24.70 | 26.76 | 2.05  | <i>Cytochrome b-245 alpha chain</i> . Cytochrome b is comprised of a light chain (alpha) and a heavy chain (beta). This gene encodes the light. alpha subunit which has been proposed as a primary component of the microbicidal oxidase system of phagocytes and the generation of . superoxide.                                                                                                                                                                                                                                                                                                                                                                                                                                                                                                                                                              | Phagocytosis<br>Phagocytic<br>vacuole<br>Oxidase |
| NCF4<br>3.03 × 10 <sup>-7</sup><br>0.032204                                                                                                                                                                                                                                                                                               | 24.47 | 26.67 | 2.20  | <i>Neutrophil cytosolic factor 4</i> . This protein encoded by this gene is a cytosolic regulatory component of the superoxide-producing phagocyte NADPH-oxidase. This protein is preferentially expressed in cells of myeloid lineage. It interacts primarily with neutrophil cytosolic factor 2 (NCF2/p67-phox) to form a complex with neutrophil cytosolic factor 1 (NCF1/p47-phox). which further interacts with the small G protein RAC1 and translocates to the membrane upon cell stimulation. This complex then activates flavocytochrome b. the membrane-integrated catalytic core of the enzyme system. The PX domain of this protein can bind phospholipid products of the PI(3) kinase. which suggests its role in PI(3) kinase-mediated signaling events. Alternatively spliced transcript variants encoding distinct isoforms have been observed | Phagocytosis<br>PI3K<br>RAC1<br>NADPH Oxydase    |
| NCF2                                                                                                                                                                                                                                                                                                                                      | 25.45 | 27.82 | 2.37  | <i>Neutrophil cytosolic factor 2</i> . Cytosolic factor 2 is the 67-kilodalton                                                                                                                                                                                                                                                                                                                                                                                                                                                                                                                                                                                                                                                                                                                                                                                 | Neutrophils                                      |

|                                          |       |       |      |                                                                                                                                                                                                                                                                                                                                                                                                                                                                                           |                                                          |
|------------------------------------------|-------|-------|------|-------------------------------------------------------------------------------------------------------------------------------------------------------------------------------------------------------------------------------------------------------------------------------------------------------------------------------------------------------------------------------------------------------------------------------------------------------------------------------------------|----------------------------------------------------------|
| 3.46 × 10 <sup>-8</sup><br>0.033195      |       |       |      | cytosolic subunit of the multi-protein NADPH oxidase complex found in neutrophils. This oxidase produces a burst of superoxide which is delivered to the lumen of the neutrophil phagosome. Alternative splicing results in multiple transcript variants encoding different isoforms.                                                                                                                                                                                                     | Phagocytosis<br>Phagocytic vacuoles<br>Oxidase           |
| MNDA<br>0<br>0.013294                    | 27.17 | 30.74 | 3.57 | <i>Myeloid cell nuclear differentiation antigen</i> . The protein is detected only in nuclei of cells of the granulocyte-monocyte lineage. MNDA resembles IFI16, suggesting that these genes participate in blood cell-specific responses to interferons.                                                                                                                                                                                                                                 | Differentiation<br>Neutrophil<br>Monocyte                |
| NCF1<br>0<br>0.008745                    | 23.81 | 28.24 | 4.43 | <i>Neutrophil cytosolic factor 1</i> .                                                                                                                                                                                                                                                                                                                                                                                                                                                    | Neutrophil                                               |
| <b>Intracellular Signalling (n = 15)</b> |       |       |      |                                                                                                                                                                                                                                                                                                                                                                                                                                                                                           |                                                          |
| SYK<br>0.014238<br>0.028254              | 27.18 | 28.17 | 0.99 | <i>Spleen associated tyrosine kinase</i> . The protein is a non-receptor type Tyr protein kinase widely expressed in hematopoietic cells and involved in coupling activated immunoreceptors to downstream signaling events that mediate diverse cellular responses. including proliferation. differentiation. and phagocytosis. Alternatively spliced transcript variants encoding different isoforms have been found for this gene.                                                      | Intracellular signalling<br>Non-receptor tyrosine kinase |
| ITGAL<br>0.03177<br>0.011871             | 26.77 | 27.61 | 0.84 | <i>Integrin subunit alpha L</i> . The encoded integrin alpha L chain forms a heterodimeric membrane proteins with the beta 2 chain (ITGB2. see below). The ligands are ICAMs 1-3 (intercellular adhesion molecules 1 through 3). Two transcript variants encoding different isoforms have been found for this gene.                                                                                                                                                                       | Integrin alpha chain<br>ITGB2                            |
| ITGAL<br>0.001299<br>0.016526            | 20.76 | 22.11 | 1.34 |                                                                                                                                                                                                                                                                                                                                                                                                                                                                                           | Integrin alpha chain                                     |
| ITGAM<br>9.7E-14<br>0.026935             | 25.54 | 28.76 | 3.22 | <i>Integrin subunit alpha M</i> . This integrin alpha M chain forms a heterodimeric membrane proteins with the beta 2 chain (ITGB2. see below) to form a leukocyte-specific integrin referred to as macrophage receptor 1 ('Mac-1'). or inactivated-C3b (iC3b) receptor 3 ('CR3'). This heterodimer is important in the adherence of neutrophils and monocytes to stimulated endothelium. and also in the phagocytosis of complement coated particles. Multiple isoforms have been found. | Integrin alpha chain<br>ITGB2                            |
| ITGB2                                    | 28.57 | 30.09 | 1.53 | <i>Integrin subunit beta 2</i> . This gene encodes an integrin beta chain. which                                                                                                                                                                                                                                                                                                                                                                                                          | Integrin beta                                            |

|                                              |       |       |      |  |                                                                                                                                                                                                                                                                                                                                                                                                                                                                                                                                                                                                                                                                                                                  |                                            |
|----------------------------------------------|-------|-------|------|--|------------------------------------------------------------------------------------------------------------------------------------------------------------------------------------------------------------------------------------------------------------------------------------------------------------------------------------------------------------------------------------------------------------------------------------------------------------------------------------------------------------------------------------------------------------------------------------------------------------------------------------------------------------------------------------------------------------------|--------------------------------------------|
| 0.000299<br>0.017857                         |       |       |      |  | combines with multiple different alpha chains to form different integrin heterodimers. The encoded protein plays an important role in immune response and defects in this gene cause leukocyte adhesion deficiency. Alternative splicing results in multiple transcript variants.                                                                                                                                                                                                                                                                                                                                                                                                                                | chain<br>ITGAL<br>ITGAM                    |
| HCLS1<br>0.028429<br>0.001312                | 28.22 | 29.08 | 0.87 |  | <i>Hematopoietic cell-specific Lyn substrate 1</i> . High bone marrow expression.                                                                                                                                                                                                                                                                                                                                                                                                                                                                                                                                                                                                                                | SRC tyrosine kinase family<br>LYN kinase   |
| CBL<br>0.004201<br>0.023884                  | 24.55 | 25.73 | 1.18 |  | <i>Cbl proto-oncogene</i> . This gene is a proto-oncogene that encodes a RING finger E3 ubiquitin ligase. The encoded protein is one of the enzymes required for targeting substrates for degradation by the proteasome. This protein mediates the transfer of ubiquitin from ubiquitin conjugating enzymes (E2) to specific substrates. This protein also contains an N-terminal phosphotyrosine binding domain that allows it to interact with numerous tyrosine-phosphorylated substrates and target them for proteasome degradation. As such it functions as a negative regulator of many signal transduction pathways. This gene has been found to be mutated or translocated in many cancers including AML | Proto-oncogene<br>Ubiquitin ligase<br>AML  |
| LILRB2<br>1.1 × 10 <sup>-6</sup><br>0.005469 | 22.15 | 24.24 | 2.09 |  | <i>Leukocyte immunoglobulin like receptor B2</i> . The encoded protein belongs to the subfamily B class of LIR receptors which contain two or four extracellular immunoglobulin domains, a transmembrane domain, and two to four cytoplasmic immunoreceptor tyrosine-based inhibitory motifs (ITIMs). The receptor binds to MHC class I molecules. Multiple transcript variants encoding different isoforms have been found for this gene.                                                                                                                                                                                                                                                                       | HLA class I                                |
| FGR<br>2.21 × 10 <sup>-8</sup><br>0.030902   | 23.77 | 26.18 | 2.41 |  | <i>FGR proto-oncogene. Src family tyrosine kinase</i> . This gene is a member of the Src family of protein tyrosine kinases. The encoded protein contains N-terminal sites for myristylation and palmitoylation, a PTK domain, and SH2 and SH3 domains which are involved in mediating protein-protein interactions with phosphotyrosine-containing and proline-rich motifs, respectively. The protein localizes to plasma membrane ruffles, and functions as a regulator of cell migration and adhesion triggered by the beta-2 integrin signal transduction pathway. Multiple alternatively spliced variants have been identified.                                                                             | SRC family tyrosine kinase<br>ITGB2        |
| HCK<br>3.64 × 10 <sup>-11</sup><br>0.037511  | 23.48 | 26.34 | 2.86 |  | <i>HCK proto-oncogene. Src family tyrosine kinase</i> . The protein is a member of the Src family of tyrosine kinases. It is primarily hemopoietic, particularly in cells of the myeloid lineages. It may help couple the Fc                                                                                                                                                                                                                                                                                                                                                                                                                                                                                     | SRC tyrosine kinase family<br>Fc receptors |

|                                                                        |       |       |      |                                                                                                                                                                                                                                                                                                                                                                                                                                                                                                                                                                                                                                                                                                                                                   |                                          |
|------------------------------------------------------------------------|-------|-------|------|---------------------------------------------------------------------------------------------------------------------------------------------------------------------------------------------------------------------------------------------------------------------------------------------------------------------------------------------------------------------------------------------------------------------------------------------------------------------------------------------------------------------------------------------------------------------------------------------------------------------------------------------------------------------------------------------------------------------------------------------------|------------------------------------------|
|                                                                        |       |       |      | receptor to the activation of the respiratory burst. In addition, it may play a role in migration. Multiple isoforms with different subcellular distributions are produced.                                                                                                                                                                                                                                                                                                                                                                                                                                                                                                                                                                       | Respiratory burst<br>Migration           |
| AGTRAP<br>3.95 × 10 <sup>-8</sup><br>0.001303                          | 23.57 | 25.93 | 2.36 | <i>Angiotensin II receptor associated protein</i> . The encoded transmembrane protein localized to the plasma membrane and perinuclear vesicular structures. It interacts with the angiotensin II type I receptor and negatively regulates angiotensin II signaling. Renin-Angiotensin may be important in AML (4).                                                                                                                                                                                                                                                                                                                                                                                                                               | Intracellular<br>signaling               |
| ANXA2;ANXA2P2<br>0.000409<br>0.002328                                  | 31.17 | 32.66 | 1.49 | <i>Annexin A2</i> . This is a member of the annexin family that is a family of calcium-dependent phospholipid-binding proteins that play a role in cellular growth and in signal transduction. This protein functions as an autocrine factor.                                                                                                                                                                                                                                                                                                                                                                                                                                                                                                     | Signaling<br>Proliferation               |
| CECR1/ADA2<br>1 × 10 <sup>-5</sup><br>0.013525                         | 25.75 | 27.64 | 1.89 | <i>Adenosine deaminase 2</i> . This gene encodes a member of a subfamily of the adenosine deaminase protein family. The encoded protein regulates levels of the signaling molecule adenosine, is secreted and may regulate cell proliferation and differentiation.                                                                                                                                                                                                                                                                                                                                                                                                                                                                                | Signaling<br>Adenosin<br>Differentiation |
| INPP5D<br>0.047215<br>0.044399                                         | 27.20 | 27.97 | 0.76 | <i>Inositol polyphosphate-5-phosphatase D</i> . The gene is a member of the inositol polyphosphate-5-phosphatase (INPP5) family. It encodes a protein whose expression is restricted to hematopoietic cells where its movement from the cytosol to the plasma membrane is mediated by tyrosine phosphorylation. At the plasma membrane, the protein hydrolyzes the 5' phosphate from phosphatidylinositol (3,4,5)-trisphosphate and inositol-1,3,4,5-tetrakisphosphate, thereby affecting multiple signaling pathways. The protein is also partly localized to the nucleus, where it may be involved in nuclear inositol phosphate signaling processes. Overall, the protein functions as a regulator of myeloid cell proliferation and survival. | Signaling                                |
| LPXN<br>0.007032<br>0.025493                                           | 24.69 | 25.79 | 1.10 | <i>Leupaxin</i> . The protein is preferentially expressed in hematopoietic cells and belongs to the paxillin family, a focal-adhesion-associated adaptor-protein family. It may function in cell type-specific signaling by associating with PYK2, a member of focal adhesion kinase family. The protein may also function in tyrosine kinase activity.                                                                                                                                                                                                                                                                                                                                                                                           | Signaling<br>Fokal adhesion<br>kinase    |
| <b>Cytoskeleton. Intracellular trafficking. Cell adhesion (n = 24)</b> |       |       |      |                                                                                                                                                                                                                                                                                                                                                                                                                                                                                                                                                                                                                                                                                                                                                   |                                          |
| ACTR3<br>0.046977<br>0.029739                                          | 30.03 | 30.79 | 0.77 | <i>Actin related protein 3</i> .                                                                                                                                                                                                                                                                                                                                                                                                                                                                                                                                                                                                                                                                                                                  |                                          |

|                                 |       |       |      |                                                                                                                                                                                                                                                                                                                                                                                                                                                                                                                             |                                                                  |
|---------------------------------|-------|-------|------|-----------------------------------------------------------------------------------------------------------------------------------------------------------------------------------------------------------------------------------------------------------------------------------------------------------------------------------------------------------------------------------------------------------------------------------------------------------------------------------------------------------------------------|------------------------------------------------------------------|
| VAMP3<br>0.046301<br>0.003763   | 25.18 | 25.95 | 0.77 | <i>Vesicle associated membrane protein 3</i> . Synaptobrevins/VAMPs, syntaxins, and the 25-kD synaptosomal-associated protein are the main components of a protein complex involved in the docking and/or fusion of synaptic vesicles with the presynaptic membrane. This gene is a member of the vesicle-associated membrane protein (VAMP)/synaptobrevin family.                                                                                                                                                          | Fusion of vesicles to the surface membrane                       |
| DNM2<br>0.041668<br>0.016485    | 21.34 | 22.13 | 0.79 | <i>Dynamin 2</i> . Dynamins represent one of the subfamilies of GTP-binding proteins. These proteins share considerable sequence similarity in the GTPase domain. Dynamins are associated with microtubules. They have been implicated in cell processes such as endocytosis and cell motility. Dynamins bind many proteins that bind actin and other cytoskeletal proteins. Dynamins can also self-assemble, a process that stimulates GTPase activity. Five alternatively spliced transcripts have been described.        | GTPase<br>Microtubule<br>Cytoskeleton<br>Endocytosis<br>Motility |
| EPN1<br>0.040906<br>0.006474    | 22.96 | 23.76 | 0.79 | <i>Sarcospan</i> . This is a member of the dystrophin-glycoprotein complex (DGC) is comprised of dystrophin, syntrophin, alpha- and beta-dystroglycans and sarcoglycans. The DGC provides a structural link between the cytoskeleton and the extracellular matrix. Two transcript variants have been described.                                                                                                                                                                                                             | Cytoskeleton<br>Extracellular matrix                             |
| SH3KBP1<br>0.015021<br>0.002592 | 25.69 | 26.67 | 0.98 | <i>SH3 domain containing kinase binding protein 1</i> . This gene encodes an adapter protein that contains one or more N-terminal Src homology domains, a proline rich region and a C-terminal coiled-coil domain. The encoded protein facilitates protein-protein interactions and has been implicated in numerous cellular processes including apoptosis, cytoskeletal rearrangement, cell adhesion and in the regulation of clathrin-dependent endocytosis. Alternate splicing results in multiple transcript variants.  | Adapter protein.<br>Cytoskeleton<br>Cell adhesion<br>Apoptosis   |
| PICALM<br>0.011976<br>0.00578   | 25.79 | 26.80 | 1.02 | <i>Phosphatidylinositol binding clathrin assembly protein</i> . This gene encodes a clathrin assembly protein, which recruits clathrin and adaptor protein complex 2 (AP2) to cell membranes at sites of coated-pit formation and clathrin-vesicle assembly. The protein is involved in AP2-dependent clathrin-mediated endocytosis. A chromosomal translocation t(10;11)(p13;q14) leading to the fusion of this gene and the MLLT10 gene is found in acute myeloid leukemia. Multiple spliced variants have been detected. | Clathrin vesicles<br>AML                                         |
| ARRB2<br>0.001072               | 25.42 | 26.79 | 1.37 | <i>Arrestin beta 2</i> . Members of arrestin/beta-arrestin protein family are thought to participate in agonist-mediated desensitization of G-                                                                                                                                                                                                                                                                                                                                                                              | G-protein coupled receptors.                                     |

|                                              |       |       |      |  |                                                                                                                                                                                                                                                                                                                                                                                                                                                                                     |                                                |
|----------------------------------------------|-------|-------|------|--|-------------------------------------------------------------------------------------------------------------------------------------------------------------------------------------------------------------------------------------------------------------------------------------------------------------------------------------------------------------------------------------------------------------------------------------------------------------------------------------|------------------------------------------------|
| 0.01648                                      |       |       |      |  | protein-coupled receptors. Multiple alternatively spliced transcript variants have been found.                                                                                                                                                                                                                                                                                                                                                                                      |                                                |
| SNX18<br>5.58 × 10 <sup>-5</sup><br>0.010733 | 21.86 | 23.57 | 1.71 |  | <i>Sorting nexin 18</i> . This gene encodes a member of the sorting nexin family. Members of this family contain a phox (PX) domain, which is a phosphoinositide binding domain, and are involved in intracellular trafficking. Multiple isoforms have been found.                                                                                                                                                                                                                  | Intracellular trafficking                      |
| AHNAK<br>0.009867<br>0.011693                | 31.88 | 32.93 | 1.05 |  | <i>AHNAK nucleoprotein</i> . The protein is a structural scaffold protein that may play a role in cell structure and migration. A shorter variant initiates a feedback loop that regulates alternative splicing of this gene.                                                                                                                                                                                                                                                       | Structure Migration                            |
| AP1G2<br>0.0014<br>0.010375                  | 23.24 | 24.57 | 1.33 |  | <i>Adaptor related protein complex 1 subunit gamma 2</i> . Adaptins, together with medium and small subunits, form a heterotetrameric complex called an adaptor, whose role is to promote the formation of clathrin-coated pits and vesicles. The protein encoded by this gene is a gamma-adaptin and belongs to the adaptor complexes large subunits family. It is thought to function at a trafficking step in the pathways between the trans-Golgi network and the cell surface. | Intracellular trafficking                      |
| S100A10<br>0.001101<br>0.016931              | 26.24 | 27.61 | 1.37 |  | <i>S100 calcium binding protein A10</i> . The protein is a member of the S100 family of calcium-binding proteins. S100 proteins are localized in the cytoplasm and/or nucleus and are involved in regulation of cell cycle progression and differentiation. This protein may function in exocytosis and endocytosis.                                                                                                                                                                | Trafficking Exocytosis Endocytosis             |
| S100A4<br>0.013936<br>0.021936               | 29.66 | 30.65 | 0.99 |  | <i>S100 calcium binding protein A4</i> . This member of the S100 family of proteins seems to function in motility, invasion, and tubulin polymerization.                                                                                                                                                                                                                                                                                                                            | Trafficking Cytoskeleton                       |
| TOM1<br>0.007641<br>0.021214                 | 25.53 | 26.62 | 1.09 |  | <i>Target of myb1 membrane trafficking protein</i> . The encoded protein shares its N-terminal domain in common with proteins associated with vesicular trafficking at the endosome. It is recruited to the endosomes by its interaction with endofin.                                                                                                                                                                                                                              | Trafficking Endosomes                          |
| SDCBP<br>1.76 × 10 <sup>-5</sup><br>0.01435  | 23.04 | 24.87 | 1.83 |  | <i>Syndecan binding protein</i> . This transmembrane protein links syndecan-mediated signaling to the cytoskeleton. This protein may also affect cytoskeletal-membrane organization, cell adhesion, protein trafficking, and the activation of transcription factors. It is also found at the endoplasmic reticulum and nucleus.                                                                                                                                                    | Cytoskeleton Signaling Endoplasmatic reticulum |
| CKAP4<br>1.41 × 10 <sup>-7</sup>             | 24.79 | 27.05 | 2.26 |  | <i>Cytoskeleton associated protein 4</i> . High expression in bone marrow cells.                                                                                                                                                                                                                                                                                                                                                                                                    | Cytoskelton                                    |

|                                                        |       |       |      |                                                                                                                                                                                                                                                                                                                                                         |                                             |
|--------------------------------------------------------|-------|-------|------|---------------------------------------------------------------------------------------------------------------------------------------------------------------------------------------------------------------------------------------------------------------------------------------------------------------------------------------------------------|---------------------------------------------|
| 0.027987<br>FAM49B<br>0.003202<br>0.027396             | 26.95 | 28.17 | 1.22 | Family with sequence similarity 49 member B. Broad expression in bone marrow. A regulator of annexin and of mitochondrial functions (5, 6).                                                                                                                                                                                                             | Cytoskeleton<br>Mitochondria                |
| CTSH<br>1.93 × 10 <sup>-14</sup><br>0.035829           | 22.34 | 25.65 | 3.31 | Cathepsin H. This lysosomal cysteine proteinase is important in degradation of lysosomal proteins. It is an aminopeptidase and an endopeptidase. Increased expression has been correlated with malignant progression of prostate tumors.                                                                                                                | Lysosome<br>Peptidase<br>Carcinogenesis     |
| CTSS<br>1.94E-05<br>0.008482                           | 26.11 | 27.93 | 1.82 | Cathepsin S. This is a lysosomal cysteine proteinase.                                                                                                                                                                                                                                                                                                   | Lysosome                                    |
| CTSZ<br>0.001692<br>0.001369                           | 26.66 | 27.97 | 1.31 | Cathepsin Z. The encoded protein is lysosomal cysteine proteinase. This gene is expressed ubiquitously in cancer cell lines and primary tumors.                                                                                                                                                                                                         | Lysosome<br>Proteinase                      |
| LYZ<br>0<br>0.015745                                   | 29.17 | 33.40 | 4.22 | Lysozyme. This protein is found in lysosomes.                                                                                                                                                                                                                                                                                                           | Lysosomes                                   |
| PSAP<br>0.02298<br>0.038796                            | 28.04 | 28.94 | 0.90 | Prosaposin. This protein is proteolytically processed to generate four main cleavage products including saposins A, B, C, and D. Saposins A-D localize primarily to the lysosomal compartment where they facilitate the catabolism of glycosphingolipids. The precursor protein exists both as a secretory protein and as an integral membrane protein. | Lysosome<br>Extracellular                   |
| DNAJC13<br>0.01467<br>0.038713                         | 26.57 | 27.56 | 0.98 | DnaJ heat shock protein family (Hsp40) member C13. This member of the Dnaj protein family whose members act as co-chaperones of a partner heat-shock protein. It associates with the heat-shock protein Hsc70 and plays a role in clathrin-mediated endocytosis.                                                                                        | Endocytosis<br>Chaperon                     |
| EPN1<br>0.040906<br>0.006474                           | 22.96 | 23.76 | 0.79 | Epsin 1. This epsin binds to clathrin and is involved in the endocytosis of clathrin-coated vesicles. Can be involved in carcinogenesis.                                                                                                                                                                                                                | Endocytosis<br>Clathrin<br>Carcinogenesis   |
| <b>RAC family-GTPases-Toll Like Receptors (n = 25)</b> |       |       |      |                                                                                                                                                                                                                                                                                                                                                         |                                             |
| RAC1<br>0.029868<br>0.041908                           | 25.46 | 26.32 | 0.86 | Rac family small GTPase 1. The protein encoded by this gene is a GTPase which belongs to the RAS superfamily of small GTP-binding proteins. Members of this superfamily appear to regulate a diverse array of cellular events. including the control of cell growth. cytoskeletal reorganization. and the activation of protein kinases. Two            | GTPase<br>Cytoskeleton<br>Kinase activation |



| transcript variants encoding different isoforms have been found for this gene. |       |       |      |                                                                                                                                                                                                                                                                                                                                                                                                                                                                                                                                                                                                                                                        |                                                                                           |
|--------------------------------------------------------------------------------|-------|-------|------|--------------------------------------------------------------------------------------------------------------------------------------------------------------------------------------------------------------------------------------------------------------------------------------------------------------------------------------------------------------------------------------------------------------------------------------------------------------------------------------------------------------------------------------------------------------------------------------------------------------------------------------------------------|-------------------------------------------------------------------------------------------|
| RHOT1<br>0.046607<br>0.02986                                                   | 24.17 | 24.93 | 0.77 | <i>Ras homolog family member T1.</i>                                                                                                                                                                                                                                                                                                                                                                                                                                                                                                                                                                                                                   | Ras homolog                                                                               |
| ARHGEF1<br>0.037731<br>0.024791                                                | 26.61 | 27.42 | 0.81 | <i>Rho guanine nucleotide exchange factor 1.</i> Rho GTPases play a fundamental role in numerous cellular processes that are initiated by extracellular stimuli that work through G protein coupled receptors (GPCR). The encoded protein may form complex with G proteins and stimulate Rho-dependent signals. Multiple alternatively spliced transcript variants have been found.                                                                                                                                                                                                                                                                    | GTPase<br>GPCR<br>Rho dependent signals                                                   |
| ARHGAP9<br>0.022128<br>0.027527                                                | 24.58 | 25.49 | 0.91 | <i>Rho GTPase activating protein 9.</i> This gene encodes a member of the Rho-GAP family of GTPase activating proteins. The protein has substantial GAP activity towards several Rho-family GTPases in vitro, converting them to an inactive GDP-bound state. It is implicated in regulating adhesion of hematopoietic cells to the extracellular matrix. Multiple transcript variants have been found.                                                                                                                                                                                                                                                | Rho-GAP family<br>GTPase<br>Adhesion                                                      |
| IL16<br>0.021885<br>0.040415                                                   | 26.21 | 27.12 | 0.91 | <i>Interleukin 16.</i> This is a pleiotropic cytokine that can function as a chemoattractant. The signaling process of this cytokine is mediated by CD4. The cytokine function is attributed to the secreted C-terminal peptide, while the N-terminal product may play a role in cell cycle control. Multiple transcript variants have been found.                                                                                                                                                                                                                                                                                                     | Cytokine<br>Cell cycle regulation                                                         |
| FMNL1<br>0.020268<br>0.012477                                                  | 27.29 | 28.22 | 0.93 | <i>Formin like 1.</i> This gene encodes a formin-related protein; these proteins have been implicated in morphogenesis, cytokinesis, and cell polarity. An alternative splice variant has been described.                                                                                                                                                                                                                                                                                                                                                                                                                                              | Cytokinesis                                                                               |
| PKN1<br>0.011951<br>0.045995                                                   | 24.62 | 25.64 | 1.02 | <i>Protein kinase N1.</i> The protein belongs to the protein kinase C superfamily. This kinase is activated by Rho family of small G proteins and may mediate the Rho-dependent signaling pathway. This kinase can be activated by phospholipids and by limited proteolysis. The 3-phosphoinositide dependent protein kinase-1 (PDPK1/PDK1) is reported to phosphorylate this kinase, which may mediate insulin signals to the actin cytoskeleton. The proteolytic activation of this kinase by caspase-3 or related proteases during apoptosis suggests its role in signal transduction of apoptosis. Alternatively spliced variants have been found. | PKC family kinase<br>Rho family<br>GTPase<br>PDK1<br>Insulin<br>Cytoskeleton<br>Apoptosis |
| RHOG                                                                           | 27.40 | 28.49 | 1.09 | <i>Ras homolog family member G.</i> This gene encodes a member of the Rho                                                                                                                                                                                                                                                                                                                                                                                                                                                                                                                                                                              | Rho family                                                                                |

|                                             |       |       |      |  |                                                                                                                                                                                                                                                                                                                                                                                                                                                                                                                                                                                                         |                                          |
|---------------------------------------------|-------|-------|------|--|---------------------------------------------------------------------------------------------------------------------------------------------------------------------------------------------------------------------------------------------------------------------------------------------------------------------------------------------------------------------------------------------------------------------------------------------------------------------------------------------------------------------------------------------------------------------------------------------------------|------------------------------------------|
| 0.007631<br>0.023656                        |       |       |      |  | family of small GTPases. which cycle between inactive GDP-bound and active GTP-bound states and function as molecular switches in signal transduction cascades. Rho proteins promote reorganization of the actin cytoskeleton. The encoded protein facilitates translocation of a functional guanine nucleotide exchange factor (GEF) complex from the cytoplasm to the plasma membrane where ras-related C3 botulinum toxin substrate 1 is activated to promote lamellipodium formation and cell migration.                                                                                            | GTPase<br>Cytoskeleton<br>Cell migration |
| ARAP1<br>0.006072<br>0.01367                | 25.03 | 26.15 | 1.13 |  | <i>ArfGAP with RhoGAP domain. ankyrin repeat and PH domain 1.</i> The protein contains SAM. ARF-GAP. RHO-GAP. ankyrin repeat. RAS-associating. and pleckstrin homology (PH) domains. In vitro. this protein displays RHO-GAP and phosphatidylinositol (3.4.5) trisphosphate (PIP3)-dependent ARF-GAP activity. The encoded protein associates with the Golgi. and the ARF-GAP activity mediates changes in the Golgi and the formation of filopodia. It is thought to regulate the cell-specific trafficking of a receptor protein involved in apoptosis. Multiple transcript variants have been found. | Golgi<br>Cell trafficking<br>Apoptosis   |
| ARHGAP30<br>0.000493<br>0.006914            | 23.15 | 24.61 | 1.47 |  | <i>Rho GTPase activating protein 30.</i> Broad expression in normal bone marrow. spleen and lymphoid organs.                                                                                                                                                                                                                                                                                                                                                                                                                                                                                            | Rho GTPase                               |
| PREX1<br>0.000316<br>0.041008               | 24.06 | 25.58 | 1.52 |  | <i>Phosphatidylinositol-3.4.5-trisphosphate dependent Rac exchange factor 1.</i> The protein encoded by this gene acts as a guanine nucleotide exchange factor for the RHO family of small GTP-binding proteins (RACs). It has been shown to bind to and activate RAC1 by exchanging bound GDP for free GTP. The encoded protein. which is found mainly in the cytoplasm. is activated by phosphatidylinositol-3.4.5-trisphosphate and the beta-gamma subunits of heterotrimeric G proteins.                                                                                                            | Rho family<br>G protein<br>GTPase        |
| GMIP<br>5.67 × 10 <sup>-5</sup><br>0.022388 | 24.14 | 25.85 | 1.71 |  | <i>GEM interacting protein.</i> This is a ARHGAP family of Rho/Rac/Cdc42-like GTPase activating protein. The encoded protein interacts with the Ras-related protein Gem through its N-terminal domain. Separately. it interacts with RhoA through a RhoGAP domain. and stimulates RhoA-dependent GTPase activity. Multiple transcript variants have been found.                                                                                                                                                                                                                                         | Rho family<br>GTPase<br>RhoA             |
| DOK2<br>2.57 × 10 <sup>-6</sup><br>0.026624 | 23.41 | 25.42 | 2.01 |  | <i>Docking protein 2.</i> The protein is constitutively tyrosine phosphorylated in hematopoietic progenitors isolated from chronic myelogenous leukemia (CML) patients in the chronic phase. It may be                                                                                                                                                                                                                                                                                                                                                                                                  | Ras/GAP<br>CML                           |

|                                                             |       |       |      |                                                                                                                                                                                                                                                                                                                                                                                                                                                                                                                                                                                                                                                                                                                      |                                              |
|-------------------------------------------------------------|-------|-------|------|----------------------------------------------------------------------------------------------------------------------------------------------------------------------------------------------------------------------------------------------------------------------------------------------------------------------------------------------------------------------------------------------------------------------------------------------------------------------------------------------------------------------------------------------------------------------------------------------------------------------------------------------------------------------------------------------------------------------|----------------------------------------------|
|                                                             |       |       |      | a critical substrate for p210(bcr/abl). This encoded protein binds p120 (RasGAP) from CML cells.                                                                                                                                                                                                                                                                                                                                                                                                                                                                                                                                                                                                                     |                                              |
| ELMO2<br>4.04 × 10 <sup>-8</sup><br>9.89 × 10 <sup>-5</sup> | 22.43 | 24.79 | 2.36 | <i>Engulfment and cell motility 2</i> . This protein interacts with the dedicator of cyto-kinesis 1 protein; it is possibly important in phagocytosis and cell migration. Alternative splicing results in multiple transcript variants.                                                                                                                                                                                                                                                                                                                                                                                                                                                                              | Phagocytosis<br>Cell migration               |
| AKAP13<br>1.11 × 10 <sup>-8</sup><br>0.001665               | 22.96 | 25.42 | 2.46 | <i>A-kinase anchoring protein 13</i> . The A-kinase anchor proteins (AKAPs) bind to the regulatory subunit of protein kinase A (PKA) and confining the holoenzyme to discrete locations within the cell. This gene encodes a member of the AKAP family. Alternative splicing of this gene results in multiple transcripts. The DH domain is associated with guanine nucleotide exchange activation for the Rho/Rac family of small GTP binding proteins. resulting in the conversion of the inactive GTPase to the active form capable of transducing signals. Therefore. these isoforms function as scaffolding proteins to coordinate a Rho signaling pathway and function as protein kinase A-anchoring proteins. | Rho/Rac family<br>GTPase<br>Protein kinase A |
| ARHGAP27<br>0.035273<br>0.01106                             | 22.36 | 23.18 | 0.82 | <i>Rho GTPase activating protein 27</i> . This protein is a member of a large family of proteins that activate Rho-type guanosine triphosphate (GTP) metabolizing enzymes. It may pay a role in clathrin-mediated endocytosis.                                                                                                                                                                                                                                                                                                                                                                                                                                                                                       | GTPase<br>Endocytosis                        |
| GPSM3<br>0.001209<br>0.007015                               | 23.05 | 24.40 | 1.35 | <i>G protein signaling modulator 3</i> . Very high expression in normal bone marrow.                                                                                                                                                                                                                                                                                                                                                                                                                                                                                                                                                                                                                                 | Signaling<br>G protein                       |
| GRK6<br>0.004294<br>0.024724                                | 22.74 | 23.92 | 1.18 | <i>G protein-coupled receptor kinase 6</i> . The encoded protein is a member of the G protein-coupled receptor kinase subfamily of the Ser/Thr protein kinase family. The protein phosphorylates the activated forms of G protein-coupled receptors thus initiating their deactivation.                                                                                                                                                                                                                                                                                                                                                                                                                              | Signaling<br>G protein                       |
| IQGAP1<br>4.72 × 10 <sup>-5</sup><br>0.003266               | 29.34 | 31.07 | 1.73 | <i>Q motif containing GTPase activating protein 1</i> . This protein contains four IQ domains, one calponin homology domain, one Ras-GAP domain and one WW domain. It interacts with components of the cytoskeleton, with cell adhesion molecules, and with several signaling molecules to regulate cell morphology and motility.                                                                                                                                                                                                                                                                                                                                                                                    | GTPase<br>Cytoskeleton<br>Sigaling           |
| RAB27A<br>0.001729<br>0.033639                              | 26.08 | 27.38 | 1.31 | <i>RAB27A, member RAS oncogene family</i> . The protein belongs to the small GTPase superfamily, Rab family. The protein is membrane-bound and may be involved in protein transport and small GTPase mediated                                                                                                                                                                                                                                                                                                                                                                                                                                                                                                        | GTPase<br>Trafficking<br>Signaling           |

| signal transduction.                        |       |       |      |                                                                                                                                                                                                                                                                                                                                                                                                                                                                          |                                                          |
|---------------------------------------------|-------|-------|------|--------------------------------------------------------------------------------------------------------------------------------------------------------------------------------------------------------------------------------------------------------------------------------------------------------------------------------------------------------------------------------------------------------------------------------------------------------------------------|----------------------------------------------------------|
| TLR2<br>3.6 × 10 <sup>-12</sup><br>0.007197 | 23.12 | 26.12 | 3.00 | <i>Toll like receptor 2.</i> This cell-surface protein can form heterodimers with other TLR family members to recognize conserved molecules. Activation of TLRs by PAMPs leads to up-regulated signaling pathways. This protein is also thought to promote apoptosis in response to bacterial lipoproteins. Alternative splicing results in multiple transcript variants.                                                                                                | TLR<br>Intracellular signaling<br>Apoptosis              |
| TOLLIP<br>0.02023<br>0.019808               | 24.21 | 25.13 | 0.93 | <i>Toll interacting protein.</i> This ubiquitin-binding protein interacts with several Toll-like receptor (TLR) signaling cascade components. The encoded protein regulates inflammatory signaling and is involved in interleukin-1 receptor trafficking and in the turnover of IL1R-associated kinase. Several isoforms have been found.                                                                                                                                | TLR<br>NFκB<br>IL1 receptor<br>Intracellular trafficking |
| NFKB1<br>0.025365<br>0.006843               | 25.67 | 26.56 | 0.89 | <i>Nuclear factor kappa B subunit 1.</i> This gene encodes a 105 kD protein which can undergo cotranslational processing by the 26S proteasome to produce a 50 kD protein. The 105 kD protein is a Rel protein-specific transcription inhibitor and the 50 kD protein is a DNA binding subunit of the NF-kappa-B (NFKB) protein complex. Activated NFKB translocates into the nucleus and stimulates gene expression. Alternative splicing results in multiple isoforms. | NFκB<br>Transcription                                    |
| IKBKG<br>0.045093<br>0.031763               | 23.53 | 24.31 | 0.77 | <i>Inhibitor of nuclear factor kappa B kinase regulatory subunit gamma.</i> This encoded protein is a regulatory subunit of the inhibitor of kappaB kinase (IKK) complex, which activates NF-kappaB resulting in activation of gene expression.                                                                                                                                                                                                                          | NFκB<br>Transcription<br>Signaling                       |
| TBK1<br>0.031434<br>0.040984                | 22.65 | 23.50 | 0.85 | <i>TANK binding kinase 1.</i> The NF-kappa-B (NFKB) complex of proteins is inhibited by I-kappa-B (IKB) proteins. Phosphorylation of serine residues on the IKB proteins by IKB kinases marks them for destruction via the ubiquitination pathway. This protein is similar to IKB kinases and can mediate NFKB activation.                                                                                                                                               | NFκB<br>Signaling<br>Phosphorylation                     |
| <b>Others (n = 5)</b>                       |       |       |      |                                                                                                                                                                                                                                                                                                                                                                                                                                                                          |                                                          |
| DBNL<br>0.027079<br>0.021184                | 26.89 | 27.76 | 0.87 | <i>Drebrin like.</i> Expressed in bone marrow. Pro-oncogenic function (7).                                                                                                                                                                                                                                                                                                                                                                                               | Oncogenic function                                       |
| FTL<br>4.07 × 10 <sup>-6</sup><br>0.025378  | 27.49 | 29.46 | 1.97 | <i>Ferritin light chain.</i> This gene encodes the light subunit of the ferritin protein, the major intracellular iron storage protein.                                                                                                                                                                                                                                                                                                                                  | Iron metabolism                                          |
| IMPDH1                                      | 24.04 | 25.74 | 1.71 | <i>Inosine monophosphate dehydrogenase 1.</i> The protein acts as a                                                                                                                                                                                                                                                                                                                                                                                                      | Nucleotide                                               |

|                                     |       |       |      |                                                                                                                                                                                                                       |                         |
|-------------------------------------|-------|-------|------|-----------------------------------------------------------------------------------------------------------------------------------------------------------------------------------------------------------------------|-------------------------|
| 5.78 × 10 <sup>-5</sup><br>0.000292 |       |       |      | homotetramer to regulate cell growth. It catalyzes the synthesis of xanthine monophosphate (XMP) from inosine-5'-monophosphate (IMP). This is the rate-limiting step in the de novo synthesis of guanine nucleotides. | synthesis or metabolism |
| PDXK<br>0.000175<br>0.042089        | 24.94 | 26.53 | 1.59 | <i>Pyridoxal kinase</i> . The protein phosphorylates vitamin B6, a step required for the conversion of vitamin B6 to pyridoxal-5-phosphate, an important cofactor in intermediary metabolism.                         | Vitamin metabolism      |
| SERPINA1<br>0.000257<br>0.037304    | 27.54 | 29.08 | 1.54 | <i>Serpin family E member 1</i> . This serine proteinase inhibitor is the principal inhibitor of tissue plasminogen activator (tPA) and urokinase (uPA).                                                              | Protease Coagulation    |

### References

- Rothblum, L.I.; Rothblum, K.; Chang, E. PAF53 is essential in mammalian cells: CRISPR/Cas9 fails to eliminate PAF53 expression. *Gene* **2017**, *612*, 55–60.
- Chen, S.; Seiler, J.; Santiago-Reichel, M.; Felbel, K.; Grummt, I.; Voit, R. Repression of RNA polymerase I upon stress is caused by inhibition of RNA-dependent deacetylation of PAF53 by SIRT7. *Mol. Cell.* **2013**, *52*, 303–313.
- Kosan, C.; Kunz, J. Identification and characterisation of the gene TWIST NEIGHBOR (TWISTNB) located in the microdeletion syndrome 7p21 region. *Cytogenet. Genome Res.* **2002**, *97*, 167–170.
- Beyazit, Y.; Aksu, S.; Haznedaroglu, I.C.; Kekilli, M.; Misirlioglu, M.; Tuncer, S.; Karakaya, J.; Koca, E.; Buyukasik, Y.; Sayinalp, N.; et al. Overexpression of the local bone marrow renin-angiotensin system in acute myeloid leukemia. *J. Natl. Med. Assoc.* **2007**, *99*, 57–63.
- Shang, W.; Jiang, Y.; Boettcher, M.; Ding, K.; Mollenauer, M.; Liu, Z.; Wen, X.; Liu, C.; Hao, P.; Zhao, S.; et al. Genome-wide CRISPR screen identifies FAM49B as a key regulator of actin dynamics and T cell activation. *Proc. Natl. Acad. Sci. USA* **2018**, *115*, E4051–E60.
- Chattaragada, M.S.; Riganti, C.; Sassoe, M.; Principe, M.; Santamorenna, M.M.; Roux, C.; Curcio, C.; Evangelista, A.; Allavena, P.; Salvia, R.; et al. FAM49B, a novel regulator of mitochondrial function and integrity that suppresses tumor metastasis. *Oncogene* **2018**, *37*, 697–709.
- Li, Z.; Park, H.R.; Shi, Z.; Li, Z.; Pham, C.D.; Du, Y.; Khuri, F.R.; Zhang, Y.; Han, Q.; Fu, H. Pro-oncogenic function of HIP-55/Drebrin-like (DBNL) through Ser269/Thr291-phospho-sensor motifs. *Oncotarget* **2014**, *5*, 3197–3209.

**Table S5.** All proteins differently expressed between high and low secretome group. The proteomic comparison of enriched primary human AML cells showing high and low constitutive release of extracellular mediators; a summary for all proteins showing differential expression when comparing the two groups. The results are presented as the protein and gene names together the median levels for primary AML cells showing low of high constitutive mediator release, the relative fold change (log<sub>2</sub> scale), and the two right columns show the z-test p-value and the Welch’s t-test p-value. Proteins with high expression in cells showing low constitutive release are marked with blue and high expression in cells with high constitutive release is indicated by red color.

| Protein name                                        | Gene name                                             | Median level Low release | Median level High release | Relative difference (fold change) High versus low release | Z-test p-value (Fold Change significance) | Welch's t-test p-value Low versus high constitutive release |
|-----------------------------------------------------|-------------------------------------------------------|--------------------------|---------------------------|-----------------------------------------------------------|-------------------------------------------|-------------------------------------------------------------|
| Spectrin beta chain. erythrocytic                   | SPTB                                                  | 24.45                    | 18.88                     | -5.57                                                     | 0                                         | 0.042684                                                    |
| Ankyrin-1                                           | ANK1                                                  | 26.04                    | 20.62                     | -5.42                                                     | 0                                         | 0.042031                                                    |
| Extended synaptotagmin-2                            | ESYT2                                                 | 23.81                    | 20.94                     | -2.86                                                     | 1.22 × 10 <sup>-13</sup>                  | 0.0053                                                      |
| Histone H1.0; Histone H1.0. N-terminally processed  | H1F0                                                  | 27.70                    | 25.30                     | -2.41                                                     | 3.46 × 10 <sup>-10</sup>                  | 0.018516                                                    |
| Alpha-synuclein                                     | SNCA                                                  | 25.78                    | 23.54                     | -2.24                                                     | 4.49 × 10 <sup>-9</sup>                   | 0.015366                                                    |
| Succinate-semialdehyde dehydrogenase. mitochondrial | ALDH5A1                                               | 27.18                    | 25.16                     | -2.02                                                     | 1 × 10 <sup>-7</sup>                      | 0.008151                                                    |
| SURP and G-patch domain-containing protein 2        | SUGP2                                                 | 24.77                    | 22.92                     | -1.85                                                     | 9.61 × 10 <sup>-7</sup>                   | 0.03471                                                     |
| RNA-binding protein Musashi homolog 2               | MSI2                                                  | 24.33                    | 22.50                     | -1.83                                                     | 1.2 × 10 <sup>-6</sup>                    | 0.012968                                                    |
| B-cell lymphoma/leukemia 11A                        | BCL11A                                                | 24.39                    | 22.67                     | -1.72                                                     | 4.67 × 10 <sup>-6</sup>                   | 0.021886                                                    |
| AT-rich interactive domain-containing protein 1B    | ARID1B                                                | 26.11                    | 24.51                     | -1.60                                                     | 1.75 × 10 <sup>-5</sup>                   | 0.008946                                                    |
| 7-dehydrocholesterol reductase                      | DHCR7                                                 | 22.86                    | 21.30                     | -1.56                                                     | 2.79 × 10 <sup>-5</sup>                   | 0.031664                                                    |
| Histone H2A type 1-J; Histone H2A type 1-H; Histone | HIST1H2AJ; HIST1H2AH; H2AFJ; HIST1H2AG; HIST1H2AD; HI | 22.57                    | 21.20                     | -1.37                                                     | 0.000188                                  | 0.038121                                                    |

|                                                                         |         |       |       |       |          |          |
|-------------------------------------------------------------------------|---------|-------|-------|-------|----------|----------|
| H2A.J;Histone H2A type 1;Histone H2A type 1-D;Histone H2A type 1-A      | ST1H2AA |       |       |       |          |          |
| Metastasis-associated protein MTA1                                      | MTA1    | 25.60 | 24.35 | -1.25 | 0.000561 | 0.046264 |
| Kinetochore-associated protein DSN1 homolog                             | DSN1    | 23.94 | 22.72 | -1.22 | 0.000754 | 0.00714  |
| Methyl-CpG-binding domain protein 3                                     | MBD3    | 24.83 | 23.67 | -1.16 | 0.001206 | 0.039855 |
| Synaptotagmin-like protein 1                                            | SYTL1   | 24.39 | 23.24 | -1.15 | 0.001349 | 0.000491 |
| ATP-dependent Clp protease ATP-binding subunit clpX-like. mitochondrial | CLPX    | 24.88 | 23.75 | -1.13 | 0.001592 | 0.010674 |
| Coiled-coil domain-containing protein 97                                | CCDC97  | 23.83 | 22.71 | -1.12 | 0.001687 | 0.00485  |
| Pogo transposable element with ZNF domain                               | POGZ    | 25.14 | 24.03 | -1.10 | 0.001956 | 0.02357  |
| DNA-directed RNA polymerase I subunit RPA1                              | POLR1A  | 25.49 | 24.42 | -1.07 | 0.002519 | 0.010079 |
| High mobility group protein 20A                                         | HMG20A  | 24.77 | 23.70 | -1.07 | 0.002578 | 0.017426 |
| Rab-like protein 3                                                      | RABL3   | 23.51 | 22.44 | -1.07 | 0.002628 | 0.002405 |
| Core-binding factor subunit beta                                        | CBFB    | 26.11 | 25.08 | -1.04 | 0.003325 | 0.046175 |
| DNA-directed RNA polymerase I subunit RPA2                              | POLR1B  | 24.10 | 23.09 | -1.02 | 0.003823 | 0.020031 |
| E3 ubiquitin-protein ligase RING2                                       | RNF2    | 25.25 | 24.26 | -1.00 | 0.00443  | 0.036123 |
| 55 kDa erythrocyte membrane protein                                     | MPP1    | 25.50 | 24.52 | -0.98 | 0.005    | 0.020847 |
| Methylmalonyl-CoA mutase. mitochondrial                                 | MUT     | 24.86 | 23.90 | -0.97 | 0.005474 | 0.024224 |
| Junctional adhesion molecule A                                          | F11R    | 25.25 | 24.30 | -0.95 | 0.006166 | 0.023361 |

|                                                           |         |       |       |       |          |          |
|-----------------------------------------------------------|---------|-------|-------|-------|----------|----------|
| Ashwin                                                    | C2orf49 | 23.50 | 22.55 | -0.95 | 0.006402 | 0.001909 |
| Cleavage and polyadenylation specificity factor subunit 4 | CPSF4   | 24.15 | 23.21 | -0.94 | 0.006581 | 0.005381 |
| Chromodomain-helicase-DNA-binding protein 3               | CHD3    | 22.95 | 22.01 | -0.93 | 0.007103 | 0.019018 |
| Glucosamine 6-phosphate N-acetyltransferase               | GNPNAT1 | 23.27 | 22.36 | -0.91 | 0.008097 | 0.030966 |
| DNA-directed RNA polymerase I subunit RPA49               | POLR1E  | 23.29 | 22.39 | -0.91 | 0.008485 | 0.049055 |
| Carbonic anhydrase 2                                      | CA2     | 27.33 | 26.43 | -0.91 | 0.008523 | 0.039685 |
| Long-chain fatty acid transport protein 4                 | SLC27A4 | 22.25 | 21.36 | -0.90 | 0.00914  | 0.007984 |
| E3 SUMO-protein ligase PIAS1                              | PIAS1   | 22.86 | 21.98 | -0.88 | 0.009831 | 0.003863 |
| Poly [ADP-ribose] polymerase 1                            | PARP1   | 31.20 | 30.34 | -0.86 | 0.011193 | 0.02295  |
| Transcription factor jun-D                                | JUND    | 23.03 | 22.17 | -0.86 | 0.011365 | 0.007308 |
| Uroporphyrinogen decarboxylase                            | UROD    | 27.04 | 26.18 | -0.86 | 0.011484 | 0.012351 |
| Spermatid perinuclear RNA-binding protein                 | STRBP   | 25.94 | 25.09 | -0.85 | 0.012156 | 0.044064 |
| Cold-inducible RNA-binding protein                        | CIRBP   | 27.25 | 26.41 | -0.83 | 0.01365  | 0.041227 |
| Activator of basal transcription 1                        | ABT1    | 23.02 | 22.21 | -0.81 | 0.01572  | 0.019734 |
| Isobutyryl-CoA dehydrogenase, mitochondrial               | ACAD8   | 23.43 | 22.62 | -0.81 | 0.015852 | 0.041066 |
| Ribosomal RNA processing protein 1 homolog B              | RRP1B   | 24.97 | 24.16 | -0.81 | 0.016278 | 0.025905 |
| AP-1 complex subunit sigma-1A                             | AP1S1   | 22.59 | 21.79 | -0.80 | 0.01668  | 0.023091 |
| Actin-like protein 6A                                     | ACTL6A  | 27.85 | 27.06 | -0.79 | 0.017829 | 0.023698 |
| 7SK snRNA                                                 | MEPCE   | 24.73 | 23.95 | -0.78 | 0.018871 | 0.025567 |



|                                                                                               |              |       |       |       |          |          |
|-----------------------------------------------------------------------------------------------|--------------|-------|-------|-------|----------|----------|
| methylphosphate capping enzyme 2-oxoisovalerate dehydrogenase subunit beta. mitochondrial     | BCKDHB       | 25.75 | 24.97 | -0.78 | 0.019368 | 0.039685 |
| Uncharacterized protein C7orf50                                                               | C7orf50      | 23.81 | 23.05 | -0.76 | 0.02186  | 0.02963  |
| DNA-directed RNA polymerase I subunit RPA43                                                   | TWISTNB      | 22.41 | 21.66 | -0.75 | 0.023213 | 0.02204  |
| Prenylcysteine oxidase 1                                                                      | PCYOX1       | 26.04 | 25.29 | -0.74 | 0.023911 | 0.024481 |
| SWI/SNF-related matrix-associated actin-dependent regulator of chromatin subfamily E member 1 | SMARCE1      | 27.37 | 26.63 | -0.74 | 0.024052 | 0.032658 |
| Zinc finger protein 428                                                                       | ZNF428       | 22.55 | 21.81 | -0.74 | 0.024212 | 0.044007 |
| Exosome complex component CSL4                                                                | EXOSC1       | 23.63 | 22.89 | -0.74 | 0.02513  | 0.006291 |
| PHD finger protein 3                                                                          | PHF3         | 23.65 | 22.93 | -0.71 | 0.028302 | 0.048744 |
| Putative Dol-P-Glc:Glc(2)Man(9)GlcN Ac(2)-PP-Dol alpha-1.2-glucosyltransferase;Do             | ALG10B;ALG10 | 23.06 | 22.35 | -0.71 | 0.028778 | 0.003021 |
| 1-P-Glc:Glc(2)Man(9)GlcN Ac(2)-PP-Dol alpha-1.2-glucosyltransferase                           |              |       |       |       |          |          |
| Ubiquitin carboxyl-terminal hydrolase 48                                                      | USP48        | 25.37 | 24.68 | -0.70 | 0.031603 | 0.022852 |
| Lanosterol synthase                                                                           | LSS          | 23.97 | 23.29 | -0.69 | 0.033442 | 0.023491 |
| DNA repair protein XRCC1                                                                      | XRCC1        | 25.73 | 25.04 | -0.68 | 0.034084 | 0.033236 |
| Inner nuclear membrane protein Man1                                                           | LEMD3        | 24.44 | 23.76 | -0.68 | 0.034641 | 0.028543 |
| Cytochrome b5                                                                                 | CYB5A        | 24.04 | 23.37 | -0.68 | 0.035378 | 0.0346   |
| Multidrug resistance-                                                                         | ABCC1        | 22.69 | 22.02 | -0.67 | 0.035616 | 0.023795 |

|                                                                                                                   |                 |                |                |                |                      |                      |
|-------------------------------------------------------------------------------------------------------------------|-----------------|----------------|----------------|----------------|----------------------|----------------------|
| associated protein 1<br>Exosome complex<br>component RRP46                                                        | EXOSC5          | 25.38          | 24.72          | -0.66          | 0.03881              | 0.048372             |
| Scaffold attachment<br>factor B2                                                                                  | SAFB2           | 25.87          | 25.21          | -0.66          | 0.038908             | 0.0158               |
| Vacuolar protein<br>sorting-associated<br>protein 72 homolog                                                      | VPS72           | 22.83          | 22.18          | -0.65          | 0.041135             | 0.041684             |
| Suppressor of SWI4 1<br>homolog                                                                                   | PPAN            | 22.62          | 21.97          | -0.64          | 0.041982             | 0.009934             |
| Endoplasmic<br>reticulum<br>metallopeptidase 1<br>Menin                                                           | ERMP1<br>MEN1   | 27.36<br>23.45 | 26.72<br>22.81 | -0.64<br>-0.64 | 0.042459<br>0.043127 | 0.026239<br>0.039881 |
| Cob(II)yrinic acid a.c-<br>diamide<br>adenosyltransferase.<br>mitochondrial                                       | MMAB            | 22.12          | 21.48          | -0.64          | 0.043785             | 0.010839             |
| Cleavage stimulation<br>factor subunit 2 tau<br>variant                                                           | CSTF2T          | 26.19          | 25.56          | -0.63          | 0.045029             | 0.045067             |
| Cip1-interacting zinc<br>finger protein                                                                           | CIZ1            | 21.70          | 21.07          | -0.63          | 0.045352             | 0.049804             |
| Nuclear receptor<br>subfamily 2 group C<br>member 2                                                               | NR2C2           | 22.69          | 22.06          | -0.62          | 0.046622             | 0.025552             |
| Lamin-B2                                                                                                          | LMNB2           | 29.51          | 28.88          | -0.62          | 0.04667              | 0.045373             |
| Nucleoporin NUP53                                                                                                 | NUP35           | 24.18          | 23.57          | -0.61          | 0.049877             | 0.006672             |
| Phosphatidylinositol<br>3,4,5-trisphosphate 5-<br>phosphatase 1<br>RUN and FYVE<br>domain-containing<br>protein 1 | INPP5D<br>RUFY1 | 27.20<br>26.03 | 27.97<br>26.79 | 0.76<br>0.77   | 0.047215<br>0.047148 | 0.044399<br>0.007889 |
| Actin-related protein 3                                                                                           | ACTR3           | 30.03          | 30.79          | 0.77           | 0.046977             | 0.029739             |
| Mitochondrial Rho<br>GTPase 1                                                                                     | RHOT1           | 24.17          | 24.93          | 0.77           | 0.046607             | 0.02986              |
| CD97 antigen;CD97<br>antigen subunit<br>alpha;CD97 antigen<br>subunit beta                                        | CD97            | 26.57          | 27.34          | 0.77           | 0.046517             | 0.010544             |

|                                                                                       |           |       |       |      |          |          |
|---------------------------------------------------------------------------------------|-----------|-------|-------|------|----------|----------|
| Vesicle-associated membrane protein 3                                                 | VAMP3     | 25.18 | 25.95 | 0.77 | 0.046301 | 0.003763 |
| Xaa-Pro dipeptidase                                                                   | PEPD      | 25.74 | 26.51 | 0.77 | 0.046016 | 0.040364 |
| NF-kappa-B essential modulator                                                        | IKBKG     | 23.53 | 24.31 | 0.77 | 0.045093 | 0.031763 |
| Proteolipid protein 2                                                                 | PLP2      | 24.56 | 25.34 | 0.79 | 0.042541 | 0.042301 |
| Calcium-binding mitochondrial carrier protein SCaMC-1                                 | SLC25A24  | 27.26 | 28.05 | 0.79 | 0.042528 | 0.017884 |
| Dynammin-2                                                                            | DNM2      | 21.34 | 22.13 | 0.79 | 0.041668 | 0.016485 |
| Epsin-1                                                                               | EPN1      | 22.96 | 23.76 | 0.79 | 0.040906 | 0.006474 |
| Rho guanine nucleotide exchange factor 1                                              | ARHGEF1   | 26.61 | 27.42 | 0.81 | 0.037731 | 0.024791 |
| Vacuolar protein sorting-associated protein 13C                                       | VPS13C    | 26.46 | 27.28 | 0.82 | 0.036679 | 0.016595 |
| Rho GTPase-activating protein 27                                                      | ARHGAP27  | 22.36 | 23.18 | 0.82 | 0.035273 | 0.011106 |
| Plexin-B2                                                                             | PLXNB2    | 25.00 | 25.85 | 0.84 | 0.032126 | 0.004193 |
| Integrin alpha-L                                                                      | ITGAL     | 26.77 | 27.61 | 0.84 | 0.03177  | 0.011871 |
| Serine/threonine-protein kinase TBK1                                                  | TBK1      | 22.65 | 23.50 | 0.85 | 0.031434 | 0.040984 |
| Ras-related C3 botulinum toxin substrate 1;Ras-related C3 botulinum toxin substrate 3 | RAC1;RAC3 | 25.46 | 26.32 | 0.86 | 0.029868 | 0.041908 |
| Hematopoietic lineage cell-specific protein                                           | HCLS1     | 28.22 | 29.08 | 0.87 | 0.028429 | 0.001312 |
| Collagen type IV alpha-3-binding protein                                              | COL4A3BP  | 23.42 | 24.29 | 0.87 | 0.027182 | 0.026718 |
| Drebrin-like protein                                                                  | DBNL      | 26.89 | 27.76 | 0.87 | 0.027079 | 0.021184 |
| Coronin-7                                                                             | CORO7     | 27.09 | 27.97 | 0.87 | 0.027074 | 0.027031 |
| Nuclear factor NF-kappa-B p105 subunit;Nuclear factor NF-kappa-B p50 subunit          | NFKB1     | 25.67 | 26.56 | 0.89 | 0.025365 | 0.006843 |
| Alpha-1,3-mannosyl-                                                                   | MGAT1     | 22.64 | 23.53 | 0.89 | 0.024897 | 0.032622 |

|                                                                                         |          |       |       |      |          |          |  |
|-----------------------------------------------------------------------------------------|----------|-------|-------|------|----------|----------|--|
| glycoprotein 2-beta-N-acetylglucosaminyltransferase                                     |          |       |       |      |          |          |  |
| SRSF protein kinase 2;SRSF protein kinase 2 N-terminal;SRSF protein kinase 2 C-terminal | SRPK2    | 21.52 | 22.42 | 0.90 | 0.023523 | 0.008372 |  |
| Prosaposin;Saposin-A;Saposin-B-Val;Saposin-B;Saposin-C;Saposin-D                        | PSAP     | 28.04 | 28.94 | 0.90 | 0.02298  | 0.038796 |  |
| Deoxyribose-phosphate aldolase                                                          | DERA     | 24.59 | 25.50 | 0.91 | 0.022803 | 0.018412 |  |
| MOB kinase activator 3A                                                                 | MOB3A    | 23.96 | 24.86 | 0.91 | 0.022685 | 0.045519 |  |
| Rho GTPase-activating protein 9                                                         | ARHGAP9  | 24.58 | 25.49 | 0.91 | 0.022128 | 0.027527 |  |
| Pro-interleukin-16;Interleukin-16                                                       | IL16     | 26.21 | 27.12 | 0.91 | 0.021885 | 0.040415 |  |
| NADH dehydrogenase [ubiquinone] 1 alpha subcomplex assembly factor 4                    | NDUFAF4  | 22.90 | 23.82 | 0.92 | 0.021398 | 0.04093  |  |
| Formin-like protein 1                                                                   | FMNL1    | 27.29 | 28.22 | 0.93 | 0.020268 | 0.012477 |  |
| Toll-interacting protein                                                                | TOLLIP   | 24.21 | 25.13 | 0.93 | 0.02023  | 0.019808 |  |
| Arfaptin-1                                                                              | ARFIP1   | 22.75 | 23.68 | 0.93 | 0.019985 | 0.008823 |  |
| Ribosomal protein S6 kinase alpha-3                                                     | RPS6KA3  | 26.33 | 27.27 | 0.94 | 0.018806 | 0.041111 |  |
| Alpha-N-acetylgalactosaminidase                                                         | NAGA     | 24.29 | 25.24 | 0.95 | 0.018001 | 0.016504 |  |
| NADPH--cytochrome P450 reductase                                                        | POR      | 25.38 | 26.33 | 0.95 | 0.017609 | 0.013909 |  |
| V-type proton ATPase subunit C 1                                                        | ATP6V1C1 | 24.60 | 25.56 | 0.96 | 0.016699 | 0.043686 |  |
| Stromal membrane-associated protein 2                                                   | SMAP2    | 24.70 | 25.67 | 0.97 | 0.016133 | 0.041711 |  |
| Cytosolic non-specific                                                                  | CNDP2    | 27.71 | 28.69 | 0.98 | 0.015037 | 0.019533 |  |

|                                                                       |         |       |       |      |          |          |
|-----------------------------------------------------------------------|---------|-------|-------|------|----------|----------|
| dipeptidase<br>SH3 domain-<br>containing kinase-<br>binding protein 1 | SH3KBP1 | 25.69 | 26.67 | 0.98 | 0.015021 | 0.002592 |
| DnaJ homolog<br>subfamily C member<br>13                              | DNAJC13 | 26.57 | 27.56 | 0.98 | 0.01467  | 0.038713 |
| Tyrosine-protein<br>kinase SYK                                        | SYK     | 27.18 | 28.17 | 0.99 | 0.014238 | 0.028254 |
| Protein S100-A4                                                       | S100A4  | 29.66 | 30.65 | 0.99 | 0.013936 | 0.021936 |
| Major vault protein                                                   | MVP     | 27.56 | 28.55 | 1.00 | 0.013507 | 0.02029  |
| Phosphatidylinositol-<br>binding clathrin<br>assembly protein         | PICALM  | 25.79 | 26.80 | 1.02 | 0.011976 | 0.00578  |
| Serine/threonine-<br>protein kinase N1                                | PKN1    | 24.62 | 25.64 | 1.02 | 0.011951 | 0.045995 |
| Arf-GAP domain and<br>FG repeat-containing<br>protein 1               | AGFG1   | 23.56 | 24.58 | 1.02 | 0.011885 | 0.009616 |
| Ubiquitin carboxyl-<br>terminal hydrolase 3                           | USP3    | 22.13 | 23.16 | 1.03 | 0.011455 | 0.009169 |
| Neuroblast<br>differentiation-<br>associated protein<br>AHNAK         | AHNAK   | 31.88 | 32.93 | 1.05 | 0.009867 | 0.011693 |
| Allograft<br>inflammatory factor 1                                    | AIF1    | 25.93 | 26.99 | 1.05 | 0.009683 | 0.02728  |
| Copine-8                                                              | CPNE8   | 21.15 | 22.22 | 1.07 | 0.008848 | 0.044482 |
| Ribonuclease inhibitor                                                | RNH1    | 29.17 | 30.24 | 1.07 | 0.008834 | 0.029158 |
| Tryptophan--tRNA<br>ligase. cytoplasmic;T1-<br>TrpRS;T2-TrpRS         | WARS    | 27.38 | 28.46 | 1.08 | 0.0082   | 0.007696 |
| Target of Myb protein<br>1                                            | TOM1    | 25.53 | 26.62 | 1.09 | 0.007641 | 0.021214 |
| Rho-related GTP-<br>binding protein RhoG                              | RHOG    | 27.40 | 28.49 | 1.09 | 0.007631 | 0.023656 |
| Protein-tyrosine kinase<br>2-beta                                     | PTK2B   | 24.62 | 25.72 | 1.10 | 0.007407 | 0.008023 |
| Leupaxin                                                              | LPXN    | 24.69 | 25.79 | 1.10 | 0.007032 | 0.025493 |
| Calpastatin                                                           | CAST    | 26.18 | 27.29 | 1.10 | 0.00703  | 0.025903 |
| Arf-GAP with Rho-                                                     | ARAP1   | 25.03 | 26.15 | 1.13 | 0.006072 | 0.01367  |

|                                                                |          |       |       |      |          |          |  |
|----------------------------------------------------------------|----------|-------|-------|------|----------|----------|--|
| GAP domain. ANK repeat and PH domain-containing protein 1      |          |       |       |      |          |          |  |
| Early endosome antigen 1                                       | EEA1     | 24.54 | 25.66 | 1.13 | 0.006029 | 0.027903 |  |
| V-type proton ATPase subunit d 1                               | ATP6V0D1 | 25.30 | 26.43 | 1.13 | 0.005817 | 0.013603 |  |
| Neutral cholesterol ester hydrolase 1                          | NCEH1    | 23.43 | 24.57 | 1.13 | 0.005743 | 0.024341 |  |
| Ig gamma-1 chain C region                                      | IGHG1    | 26.10 | 27.24 | 1.14 | 0.005561 | 0.036807 |  |
| Phosphoenolpyruvate carboxykinase [GTP]. mitochondrial         | PCK2     | 25.61 | 26.76 | 1.14 | 0.005388 | 0.011307 |  |
| Serine beta-lactamase-like protein LACTB. mitochondrial        | LACTB    | 24.28 | 25.43 | 1.15 | 0.005138 | 0.019455 |  |
| Ubiquitin-like-conjugating enzyme ATG3                         | ATG3     | 24.73 | 25.90 | 1.16 | 0.0047   | 0.009424 |  |
| Opioid growth factor receptor                                  | OGFR     | 24.17 | 25.34 | 1.17 | 0.004655 | 0.004815 |  |
| Alpha-1-antichymotrypsin;Alpha-1-antichymotrypsin His-Pro-less | SERPINA3 | 26.64 | 27.81 | 1.17 | 0.004543 | 0.004647 |  |
| G protein-coupled receptor kinase 6                            | GRK6     | 22.74 | 23.92 | 1.18 | 0.004294 | 0.024724 |  |
| E3 ubiquitin-protein ligase CBL                                | CBL      | 24.55 | 25.73 | 1.18 | 0.004201 | 0.023884 |  |
| Protein S100-A6                                                | S100A6   | 26.90 | 28.09 | 1.19 | 0.003855 | 0.029083 |  |
| Protein FAM49B                                                 | FAM49B   | 26.95 | 28.17 | 1.22 | 0.003202 | 0.027396 |  |
| N-acetyl-D-glucosamine kinase                                  | NAGK     | 26.90 | 28.13 | 1.23 | 0.002925 | 0.016932 |  |
| Ras-related protein Rab-27A                                    | RAB27A   | 26.08 | 27.38 | 1.31 | 0.001729 | 0.033639 |  |
| Cathepsin Z                                                    | CTSZ     | 26.66 | 27.97 | 1.31 | 0.001692 | 0.001369 |  |
| Phostensin                                                     | PPP1R18  | 24.54 | 25.85 | 1.32 | 0.001568 | 0.010525 |  |
| AP-1 complex subunit gamma-like 2                              | AP1G2    | 23.24 | 24.57 | 1.33 | 0.0014   | 0.010375 |  |

|                                                                            |               |       |       |      |          |          |
|----------------------------------------------------------------------------|---------------|-------|-------|------|----------|----------|
| Integrin alpha-L                                                           | ITGAL         | 20.76 | 22.11 | 1.34 | 0.001299 | 0.016526 |
| Pleckstrin homology domain-containing family O member 2                    | PLEKHO2       | 24.35 | 25.71 | 1.35 | 0.001235 | 0.002878 |
| G-protein-signaling modulator 3                                            | GPSM3         | 23.05 | 24.40 | 1.35 | 0.001209 | 0.007015 |
| Protein unc-93 homolog B1                                                  | UNC93B1       | 22.97 | 24.33 | 1.36 | 0.001191 | 0.005074 |
| Protein S100-A10                                                           | S100A10       | 26.24 | 27.61 | 1.37 | 0.001101 | 0.016931 |
| Beta-arrestin-2                                                            | ARRB2         | 25.42 | 26.79 | 1.37 | 0.001072 | 0.01648  |
| Procollagen galactosyltransferase 1                                        | COLGALT1      | 26.12 | 27.48 | 1.37 | 0.001069 | 0.03412  |
| Sorting nexin-1                                                            | SNX1          | 24.59 | 25.96 | 1.37 | 0.001055 | 0.006134 |
| CapZ-interacting protein                                                   | RCSD1         | 25.83 | 27.22 | 1.39 | 0.000926 | 0.029507 |
| IgG receptor FcRn large subunit p51                                        | FCGRT         | 21.91 | 23.31 | 1.40 | 0.000867 | 0.017551 |
| Osteoclast-stimulating factor 1                                            | OSTF1         | 26.27 | 27.71 | 1.44 | 0.000628 | 0.02374  |
| Serpin B8                                                                  | SERPINB8      | 25.30 | 26.75 | 1.45 | 0.000554 | 0.010419 |
| Sorting nexin-27                                                           | SNX27         | 24.06 | 25.53 | 1.46 | 0.000509 | 0.003824 |
| Rho GTPase-activating protein 30                                           | ARHGAP30      | 23.15 | 24.61 | 1.47 | 0.000493 | 0.006914 |
| Rab11 family-interacting protein 1                                         | RAB11FIP1     | 23.84 | 25.33 | 1.49 | 0.000412 | 0.01493  |
| Annexin A2;Putative annexin A2-like protein                                | ANXA2;ANXA2P2 | 31.17 | 32.66 | 1.49 | 0.000409 | 0.002328 |
| MAP kinase-activated protein kinase 2                                      | MAPKAPK2      | 21.82 | 23.31 | 1.49 | 0.000395 | 0.046492 |
| FK506-binding protein 15                                                   | FKBP15        | 24.88 | 26.39 | 1.51 | 0.000354 | 0.010975 |
| Phosphatidylinositol 3,4,5-trisphosphate-dependent Rac exchanger 1 protein | PREX1         | 24.06 | 25.58 | 1.52 | 0.000316 | 0.041008 |
| Integrin beta-2                                                            | ITGB2         | 28.57 | 30.09 | 1.53 | 0.000299 | 0.017857 |
| P2X purinoceptor 4                                                         | P2RX4         | 22.31 | 23.84 | 1.53 | 0.000295 | 0.042154 |
| Dynein light chain Tctex-type 1                                            | DYNLT1        | 23.03 | 24.57 | 1.54 | 0.000274 | 0.041506 |
| Alpha-1-                                                                   | SERPINA1      | 27.54 | 29.08 | 1.54 | 0.000257 | 0.037304 |

|                                                                                           |         |       |       |      |                       |          |
|-------------------------------------------------------------------------------------------|---------|-------|-------|------|-----------------------|----------|
| antitrypsin;Short peptide from AAT HLA class II histocompatibility antigen. DM beta chain | HLA-DMB | 23.00 | 24.57 | 1.56 | 0.000213              | 0.021238 |
| Pyridoxal kinase                                                                          | PDXK    | 24.94 | 26.53 | 1.59 | 0.000175              | 0.042089 |
| Hexokinase-2                                                                              | HK2     | 23.44 | 25.05 | 1.61 | 0.000145              | 0.019488 |
| DNA helicase MCM9                                                                         | MCM9    | 22.31 | 23.95 | 1.64 | 0.000111              | 0.03988  |
| PML-RARA-regulated adapter molecule 1                                                     | PRAM1   | 25.79 | 27.42 | 1.64 | 0.00011               | 0.035983 |
| Absent in melanoma 1 protein                                                              | AIM1    | 22.50 | 24.14 | 1.64 | 0.000107              | 0.026961 |
| Calpain-2 catalytic subunit                                                               | CAPN2   | 27.19 | 28.84 | 1.65 | 0.0001                | 0.005489 |
| EF-hand domain-containing protein D2                                                      | EFHD2   | 25.98 | 27.66 | 1.67 | $7.95 \times 10^{-5}$ | 0.006606 |
| Protein S100-A11;Protein S100-A11. N-terminally processed                                 | S100A11 | 28.99 | 30.66 | 1.67 | $7.91 \times 10^{-5}$ | 0.009925 |
| Inosine-5-monophosphate dehydrogenase 1                                                   | IMPDH1  | 24.04 | 25.74 | 1.71 | $5.78 \times 10^{-5}$ | 0.000292 |
| GEM-interacting protein                                                                   | GMIP    | 24.14 | 25.85 | 1.71 | $5.67 \times 10^{-5}$ | 0.022388 |
| Sorting nexin-18                                                                          | SNX18   | 21.86 | 23.57 | 1.71 | $5.58 \times 10^{-5}$ | 0.010733 |
| Protein Niban                                                                             | FAM129A | 24.87 | 26.60 | 1.72 | $4.97 \times 10^{-5}$ | 0.048942 |
| Ras GTPase-activating-like protein IQGAP1                                                 | IQGAP1  | 29.34 | 31.07 | 1.73 | $4.72 \times 10^{-5}$ | 0.003266 |
| Placenta-specific gene 8 protein                                                          | PLAC8   | 23.02 | 24.76 | 1.74 | $4.37 \times 10^{-5}$ | 0.045865 |
| GTPase IMAP family member 4                                                               | GIMAP4  | 24.59 | 26.34 | 1.75 | $3.83 \times 10^{-5}$ | 0.032074 |
| GTPase IMAP family member 7                                                               | GIMAP7  | 22.46 | 24.21 | 1.76 | $3.63 \times 10^{-5}$ | 0.028552 |
| Arachidonate 5-lipoxygenase-activating protein                                            | ALOX5AP | 24.82 | 26.62 | 1.80 | $2.37 \times 10^{-5}$ | 0.037157 |
| Cathepsin S                                                                               | CTSS    | 26.11 | 27.93 | 1.82 | $1.94 \times 10^{-5}$ | 0.008482 |



|                                                             |         |       |       |      |                       |          |
|-------------------------------------------------------------|---------|-------|-------|------|-----------------------|----------|
| Unconventional myosin-I $\alpha$                            | MYO1F   | 27.16 | 28.99 | 1.83 | $1.84 \times 10^{-5}$ | 0.015164 |
| Syntenin-1                                                  | SDCBP   | 23.04 | 24.87 | 1.83 | $1.76 \times 10^{-5}$ | 0.01435  |
| Golgi-associated plant pathogenesis-related protein 1       | GLIPR2  | 25.03 | 26.86 | 1.84 | $1.64 \times 10^{-5}$ | 0.007614 |
| Coactosin-like protein                                      | COTL1   | 27.65 | 29.49 | 1.84 | $1.52 \times 10^{-5}$ | 0.016551 |
| Galectin-3                                                  | LGALS3  | 24.48 | 26.33 | 1.85 | $1.43 \times 10^{-5}$ | 0.008959 |
| Retinoid-inducible serine carboxypeptidase                  | SCPEP1  | 24.25 | 26.12 | 1.87 | $1.16 \times 10^{-5}$ | 0.039998 |
| Caspase-1;Caspase-1 subunit p20;Caspase-1 subunit p10       | CASP1   | 25.81 | 27.68 | 1.87 | $1.12 \times 10^{-5}$ | 0.013103 |
| High affinity immunoglobulin epsilon receptor subunit gamma | FCER1G  | 23.52 | 25.40 | 1.88 | $1.03 \times 10^{-5}$ | 0.014456 |
| Adenosine deaminase CECR1                                   | CECR1   | 25.75 | 27.64 | 1.89 | $1 \times 10^{-5}$    | 0.013525 |
| Receptor expression-enhancing protein 5                     | REEP5   | 23.41 | 25.35 | 1.94 | $5.69 \times 10^{-6}$ | 0.003174 |
| Ferritin light chain                                        | FTL     | 27.49 | 29.46 | 1.97 | $4.07 \times 10^{-6}$ | 0.025378 |
| Docking protein 2                                           | DOK2    | 23.41 | 25.42 | 2.01 | $2.57 \times 10^{-6}$ | 0.026624 |
| Apolipoprotein B receptor                                   | APOBR   | 26.21 | 28.23 | 2.01 | $2.51 \times 10^{-6}$ | 0.008843 |
| Protein FAM65B                                              | FAM65B  | 21.64 | 23.66 | 2.02 | $2.3 \times 10^{-6}$  | 0.003139 |
| Long-chain fatty acid transport protein 3                   | SLC27A3 | 23.81 | 25.85 | 2.04 | $1.99 \times 10^{-6}$ | 0.00393  |
| TYRO protein tyrosine kinase-binding protein                | TYROBP  | 23.34 | 25.38 | 2.05 | $1.77 \times 10^{-6}$ | 0.005545 |
| Cytochrome b-245 light chain                                | CYBA    | 24.70 | 26.76 | 2.05 | $1.61 \times 10^{-6}$ | 0.006509 |
| Leukocyte immunoglobulin-like receptor subfamily B member 2 | LILRB2  | 22.15 | 24.24 | 2.09 | $1.1 \times 10^{-6}$  | 0.005469 |
| Receptor-type tyrosine-protein phosphatase epsilon          | PTPRE   | 22.68 | 24.78 | 2.10 | $9.55 \times 10^{-7}$ | 0.013468 |
| Mini-chromosome                                             | MCMBP   | 23.22 | 25.35 | 2.13 | $6.62 \times 10^{-7}$ | 0.036588 |

|                                                            |         |       |       |      |                        |          |  |
|------------------------------------------------------------|---------|-------|-------|------|------------------------|----------|--|
| maintenance complex-binding protein                        |         |       |       |      |                        |          |  |
| Neutrophil cytosol factor 4                                | NCF4    | 24.47 | 26.67 | 2.20 | $3.03 \times 10^{-7}$  | 0.032204 |  |
| Biliverdin reductase A                                     | BLVRA   | 24.91 | 27.11 | 2.20 | $2.93 \times 10^{-7}$  | 0.01654  |  |
| Phospholipase D3                                           | PLD3    | 23.51 | 25.75 | 2.24 | $1.82 \times 10^{-7}$  | 0.000942 |  |
| Cytoskeleton-associated protein 4                          | CKAP4   | 24.79 | 27.05 | 2.26 | $1.41 \times 10^{-7}$  | 0.027987 |  |
| Protein FAM107B                                            | FAM107B | 22.08 | 24.37 | 2.29 | $9.92 \times 10^{-8}$  | 0.016325 |  |
| Deoxynucleoside triphosphate triphosphohydrolase SAMHD1    | SAMHD1  | 28.90 | 31.24 | 2.33 | $5.72 \times 10^{-8}$  | 0.006459 |  |
| Voltage-gated hydrogen channel 1                           | HVCN1   | 23.95 | 26.29 | 2.34 | $5.31 \times 10^{-8}$  | 0.001412 |  |
| Engulfment and cell motility protein 2                     | ELMO2   | 22.43 | 24.79 | 2.36 | $4.04 \times 10^{-8}$  | 9.89E-05 |  |
| Type-1 angiotensin II receptor-associated protein          | AGTRAP  | 23.57 | 25.93 | 2.36 | $3.95 \times 10^{-8}$  | 0.001303 |  |
| Neutrophil cytosol factor 2                                | NCF2    | 25.45 | 27.82 | 2.37 | $3.46 \times 10^{-8}$  | 0.033195 |  |
| Tyrosine-protein kinase Fgr                                | FGR     | 23.77 | 26.18 | 2.41 | $2.21 \times 10^{-8}$  | 0.030902 |  |
| Annexin A5                                                 | ANXA5   | 28.25 | 30.66 | 2.41 | $2.1 \times 10^{-8}$   | 0.020175 |  |
| A-kinase anchor protein 13                                 | AKAP13  | 22.96 | 25.42 | 2.46 | $1.11 \times 10^{-8}$  | 0.001665 |  |
| Protein EVI2B                                              | EVI2B   | 23.71 | 26.23 | 2.53 | $4.59 \times 10^{-9}$  | 0.000574 |  |
| Tyrosine-protein phosphatase non-receptor type substrate 1 | SIRPA   | 22.71 | 25.25 | 2.54 | $3.96 \times 10^{-9}$  | 0.029358 |  |
| Arachidonate 5-lipoxygenase                                | ALOX5   | 23.20 | 25.84 | 2.64 | $8.81 \times 10^{-10}$ | 0.032953 |  |
| Tumor necrosis factor alpha-induced protein 2              | TNFAIP2 | 21.94 | 24.65 | 2.72 | $3.05 \times 10^{-10}$ | 0.025666 |  |
| Brain acid soluble protein 1                               | BASP1   | 23.84 | 26.63 | 2.79 | $1.04 \times 10^{-10}$ | 0.011457 |  |
| Tyrosine-protein kinase HCK                                | HCK     | 23.48 | 26.34 | 2.86 | $3.64 \times 10^{-11}$ | 0.037511 |  |

|                                                                                                                    |                  |       |       |      |                        |                       |
|--------------------------------------------------------------------------------------------------------------------|------------------|-------|-------|------|------------------------|-----------------------|
| V-type proton ATPase 116 kDa subunit a isoform 3                                                                   | TCIRG1           | 23.91 | 26.80 | 2.89 | $2.29 \times 10^{-11}$ | 0.024482              |
| BTB/POZ domain-containing protein KCTD12                                                                           | KCTD12           | 25.21 | 28.13 | 2.92 | $1.42 \times 10^{-11}$ | 0.012589              |
| Toll-like receptor 2                                                                                               | TLR2             | 23.12 | 26.12 | 3.00 | $3.6 \times 10^{-12}$  | 0.007197              |
| Dihydropyrimidine dehydrogenase [NADP(+)]                                                                          | DPYD             | 24.24 | 27.36 | 3.12 | $5.03 \times 10^{-13}$ | 0.030795              |
| Integrin alpha-M Sulfotransferase 1A4;Sulfotransferase 1A3                                                         | ITGAM            | 25.54 | 28.76 | 3.22 | $9.7 \times 10^{-14}$  | 0.026935              |
| Ribonuclease K6 Pro-cathepsin H;Cathepsin H mini chain;Cathepsin H;Cathepsin H heavy chain;Cathepsin H light chain | SULT1A4;SULT1A3  | 22.76 | 26.02 | 3.26 | $5.02 \times 10^{-14}$ | 0.036611              |
| Thymidine phosphorylase                                                                                            | RNASE6           | 21.72 | 25.02 | 3.30 | $2.33 \times 10^{-14}$ | $4.49 \times 10^{-5}$ |
| Myeloid cell nuclear differentiation antigen                                                                       | CTSH             | 22.34 | 25.65 | 3.31 | $1.93 \times 10^{-14}$ | 0.035829              |
| Phospholipase B-like 1;Phospholipase B-like 1 chain                                                                | TYMP             | 25.03 | 28.45 | 3.42 | $2.66 \times 10^{-15}$ | 0.005569              |
| A;Phospholipase B-like 1 chain                                                                                     | MNDA             | 27.17 | 30.74 | 3.57 | 0                      | 0.013294              |
| B;Phospholipase B-like 1 chain C                                                                                   | PLBD1            | 21.70 | 25.50 | 3.80 | 0                      | 0.000662              |
| Cytochrome b-245 heavy chain                                                                                       | CYBB             | 25.40 | 29.22 | 3.82 | 0                      | 0.017764              |
| Heme oxygenase 1                                                                                                   | HMOX1            | 20.53 | 24.62 | 4.09 | 0                      | 0.002634              |
| Lysozyme C                                                                                                         | LYZ              | 29.17 | 33.40 | 4.22 | 0                      | 0.015745              |
| Neutrophil cytosol factor 1;Putative neutrophil cytosol factor 1B;Putative neutrophil cytosol                      | NCF1;NCF1B;NCF1C | 23.81 | 28.24 | 4.43 | 0                      | 0.008745              |

|                                                                                                                                                                                                                                                                    |         |       |       |      |   |                         |  |
|--------------------------------------------------------------------------------------------------------------------------------------------------------------------------------------------------------------------------------------------------------------------|---------|-------|-------|------|---|-------------------------|--|
| factor 1C                                                                                                                                                                                                                                                          |         |       |       |      |   |                         |  |
| Protein THEMIS2                                                                                                                                                                                                                                                    | THEMIS2 | 22.31 | 26.75 | 4.43 | 0 | 0.001118                |  |
| Gamma-interferon-inducible lysosomal thiol reductase                                                                                                                                                                                                               | IFI30   | 24.39 | 28.82 | 4.43 | 0 | 0.004753                |  |
| Galectin-10                                                                                                                                                                                                                                                        | CLC     | 22.09 | 26.54 | 4.45 | 0 | 0.020032                |  |
| Protein S100-A9                                                                                                                                                                                                                                                    | S100A9  | 27.69 | 32.69 | 5.00 | 0 | 0.004781                |  |
| Protein S100-A8;Protein S100-A8. N-terminally processed                                                                                                                                                                                                            | S100A8  | 27.52 | 32.58 | 5.05 | 0 | 0.005576                |  |
| Bone marrow proteoglycan; Eosinophil granule major basic protein                                                                                                                                                                                                   | PRG2    | 20.91 | 26.10 | 5.19 | 0 | 0.035599                |  |
| Prolow-density lipoprotein receptor-related protein 1;Low-density lipoprotein receptor-related protein 1 85 kDa subunit;Low-density lipoprotein receptor-related protein 1 515 kDa subunit;Low-density lipoprotein receptor-related protein 1 intracellular domain | LRP1    | 20.48 | 26.53 | 6.06 | 0 | 4.36 × 10 <sup>-5</sup> |  |

---
